# Supplementary material for: Evaluation of Hsp90 and mTOR inhibitors as potential drugs for the treatment of TSC1/TSC2 deficient cancer
Source: PubMed Central journal article supplement (PMC8064564; doi:10.1371/journal.pone.0248380), 2021-04-23

**Figure 1**  
super signal west pico chemiluminescent  
after 2 min.

|               | PEER |   | CW2 |   | 2313287 |   | KM12 |   | HCC95 |   | MGH-U1 |   |
|---------------|------|---|-----|---|---------|---|------|---|-------|---|--------|---|
| Serum (30min) | -    | + | -   | + | -       | + | -    | + | -     | + | -      | + |

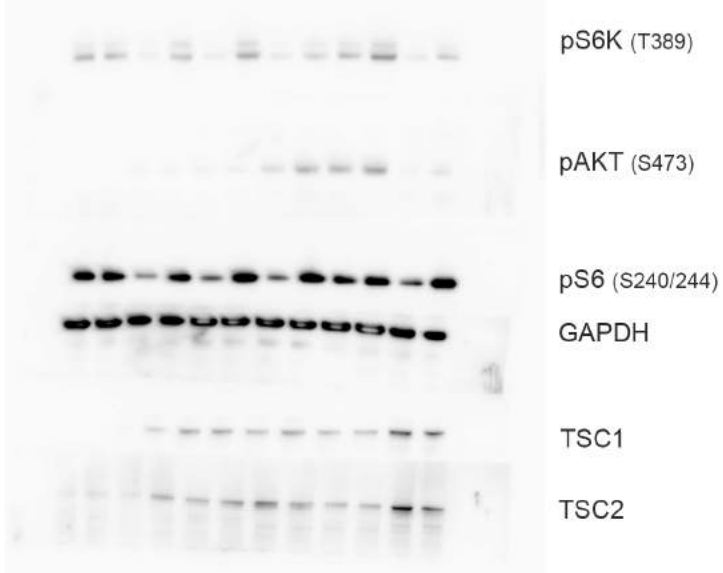

super signal west pico chemiluminescent  
after 1 min.

| MFE-319 |   | OVK18 |   | MGH-U1 |   |
|---------|---|-------|---|--------|---|
| -       | + | -     | + | -      | + |

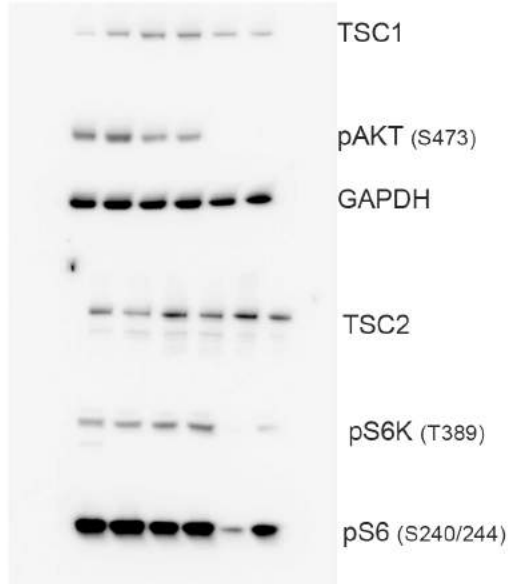

super signal west pico chemiluminescent  
after 2 min.

| SNU-886 |   | SNU-878 |   | NCIH1651 |   | DV90 |   | HEC151 |   | MGH-U1 |   |
|---------|---|---------|---|----------|---|------|---|--------|---|--------|---|
| -       | + | -       | + | -        | + | -    | + | -      | + | -      | + |

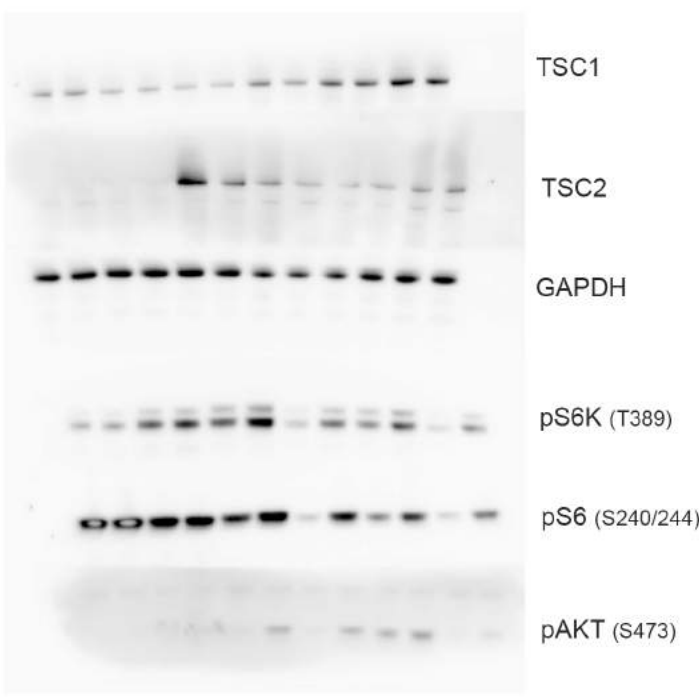

super signal west pico chemiluminescent  
after 3 min.  
stripped membranes

| MFE-319 |   | OVK18 |   | MGH-U1 |   |
|---------|---|-------|---|--------|---|
| -       | + | -     | + | -      | + |

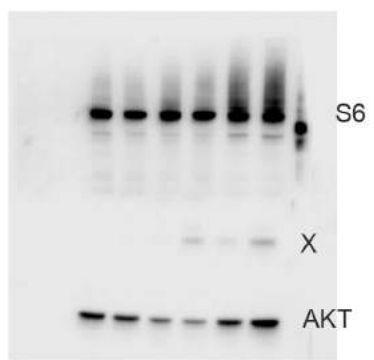

super signal west femto chemiluminescent after 1 min.  
stripped membranes

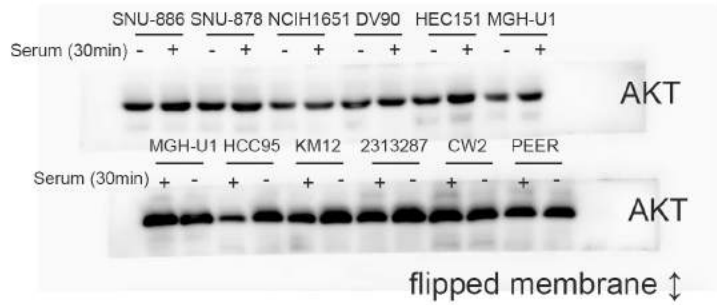

super signal west femto chemiluminescent after 2 min.  
stripped membranes

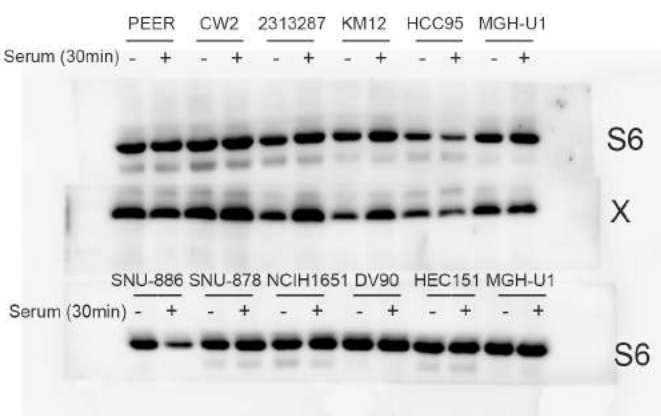

Figure 1  
 super signal west pico chemiluminescent  
 after 1 min.  
 membranes blotted second time

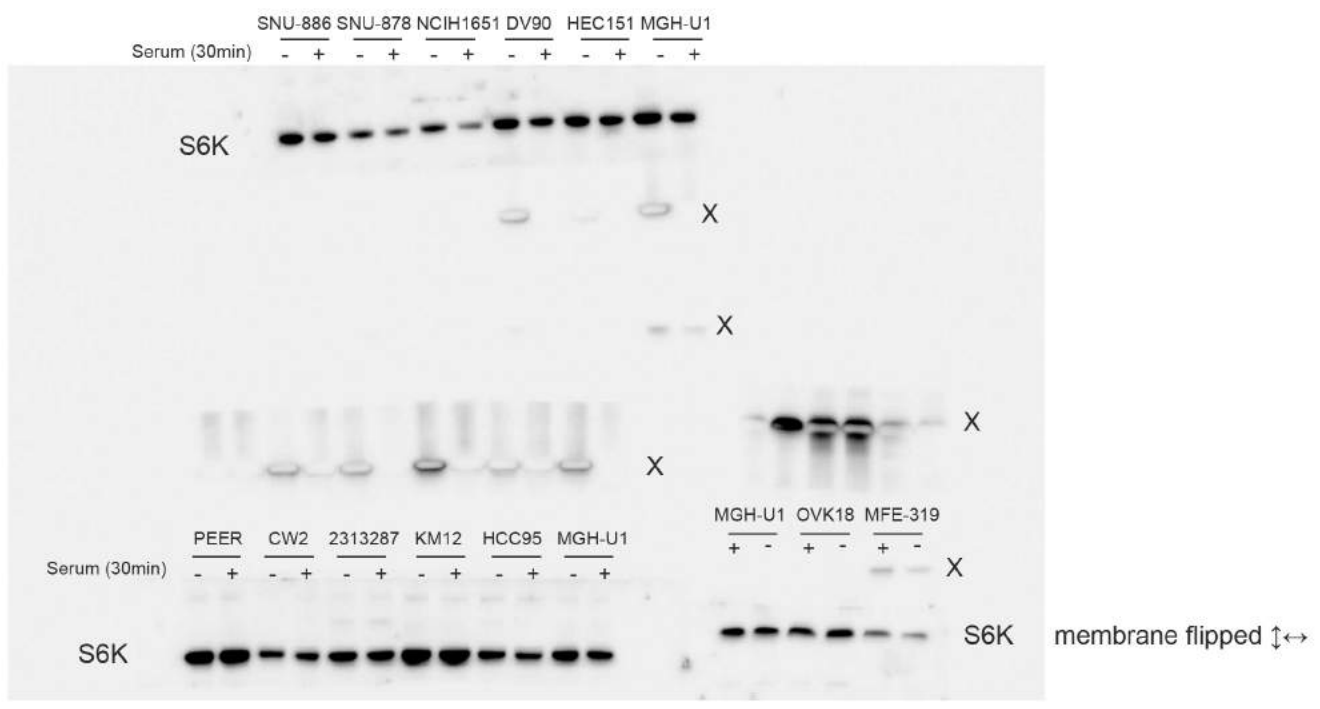

**Figure 2**  
super signal west femto chemiluminescent  
after 2 min.

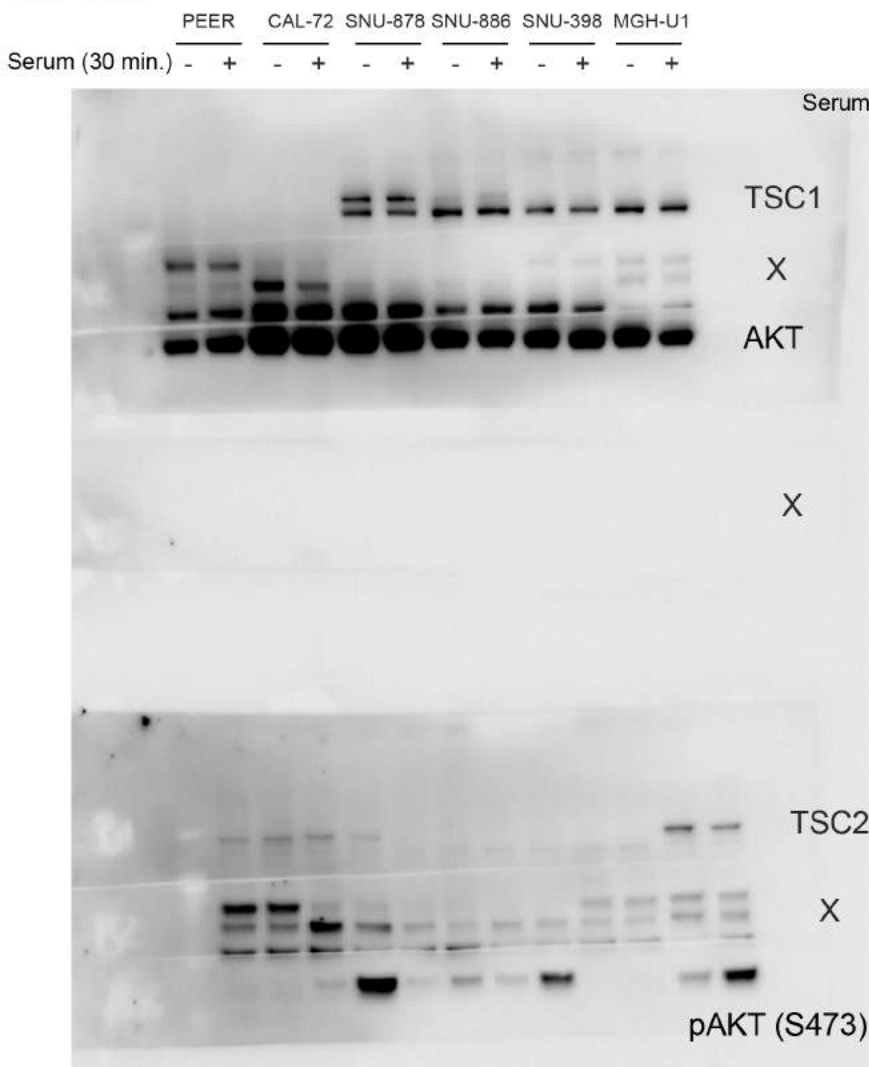

super signal west pico chemiluminescent  
after 1 min.

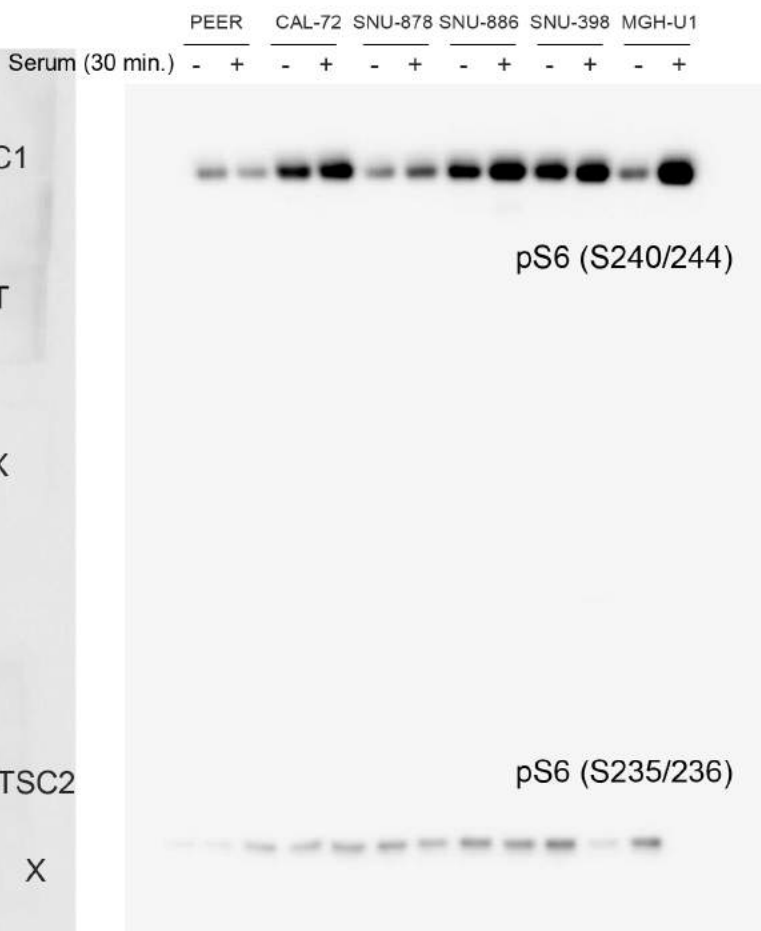

super signal west pico chemiluminescent  
after 5 min.

membrane blotted second time

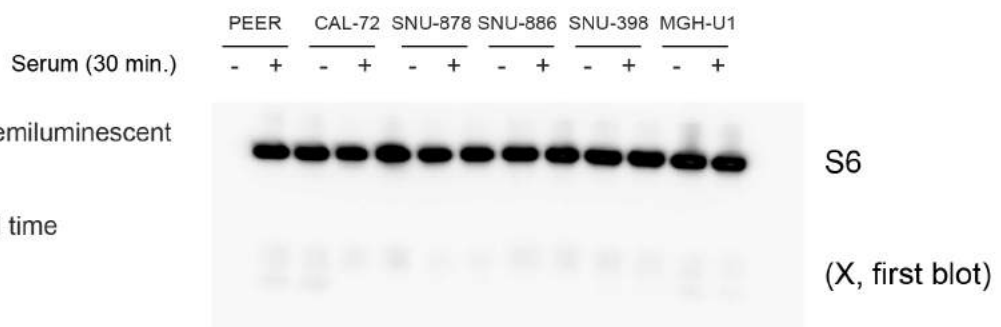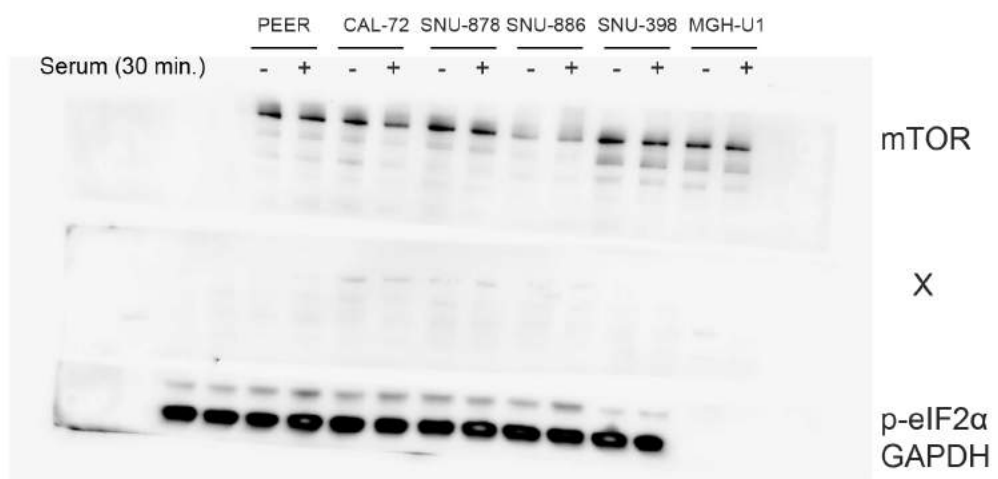

Figure 2

| Serum (30 min.) | PEER |   | CAL-72 |   | SNU-878 |   | SNU-886 |   | SNU-398 |   | MGH-U1 |   |
|-----------------|------|---|--------|---|---------|---|---------|---|---------|---|--------|---|
|                 | -    | + | -      | + | -       | + | -       | + | -       | + | -      | + |

super signal west femto chemiluminescent  
after 5 min.

stripped membranes

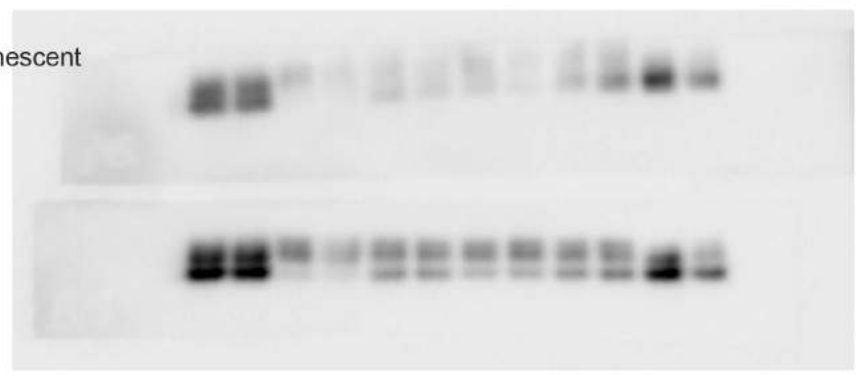

X

4E-BP1

super signal west femto chemiluminescent  
after 5 min.

stripped membranes

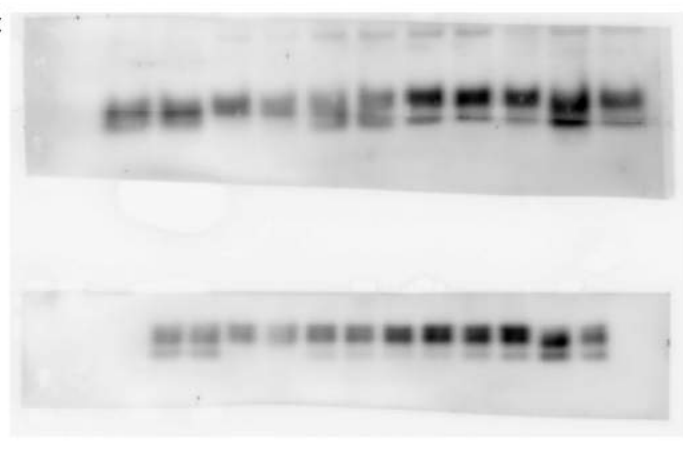

X

p4E-BP1 (T37/46)

super signal west femto chemiluminescent  
after 1 min.

stripped membranes

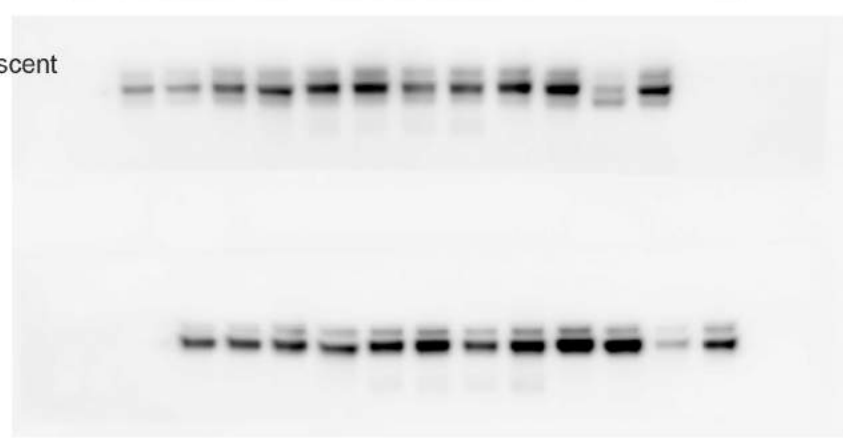

X

pS6K (T389)

super signal west femto chemiluminescent  
after 3 min.

stripped membranes

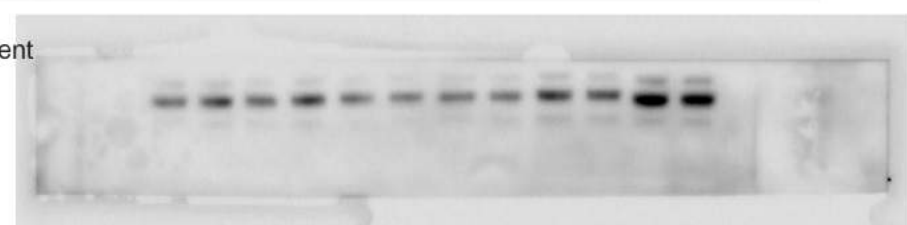

S6K

| Serum (30 min.) | PEER |   | CAL-72 |   | SNU-878 |   | SNU-886 |   | SNU-398 |   | MGH-U1 |   | X |
|-----------------|------|---|--------|---|---------|---|---------|---|---------|---|--------|---|---|
|                 | -    | + | -      | + | -       | + | -       | + | -       | + | -      | + |   |

super signal west pico chemiluminescent  
after 3 min.

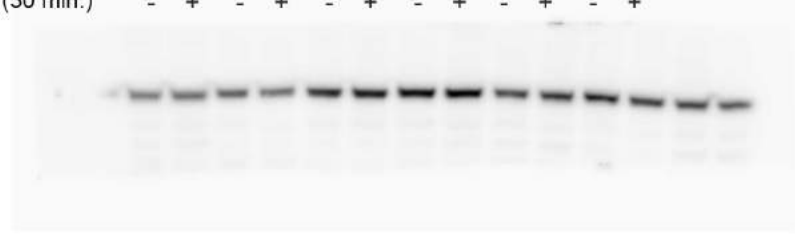

BIP

Figure 4

super signal west femto chemiluminescent after 3 min.

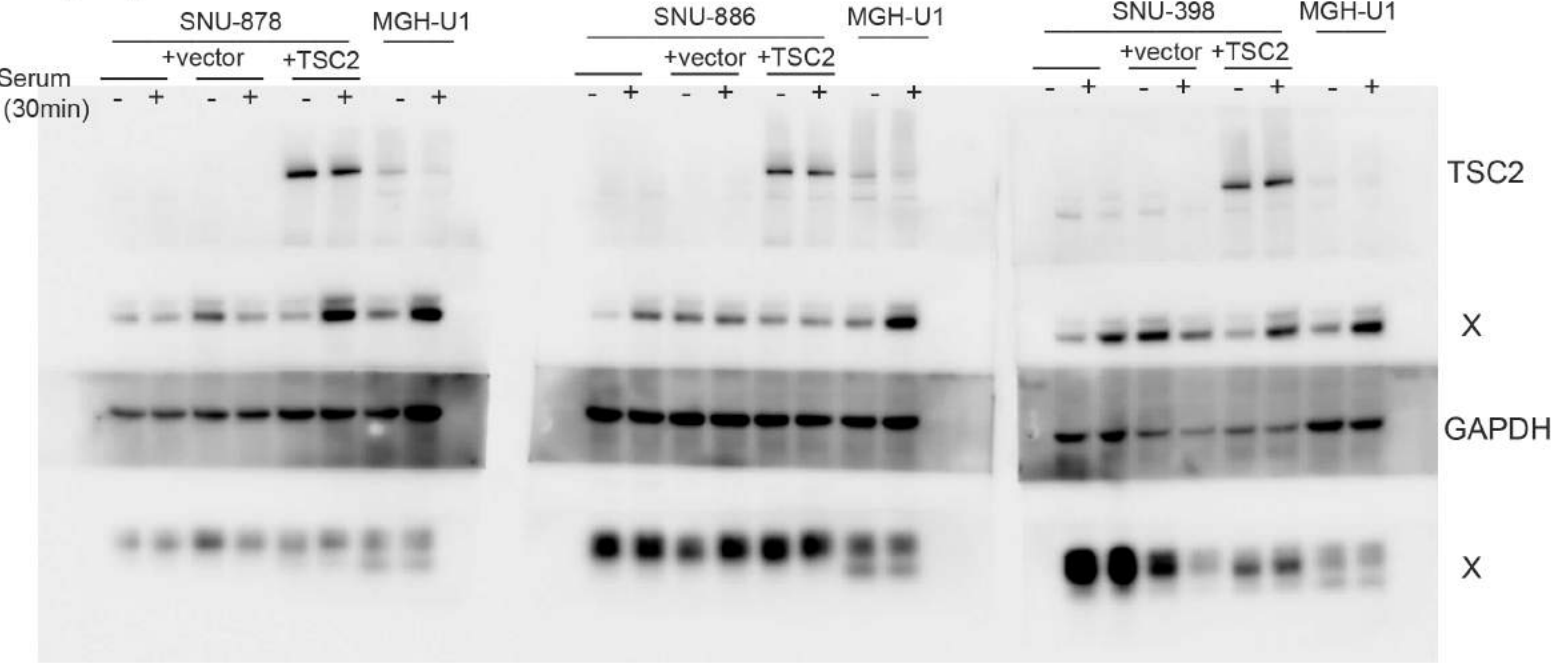

super signal west pico chemiluminescent after 3 min.

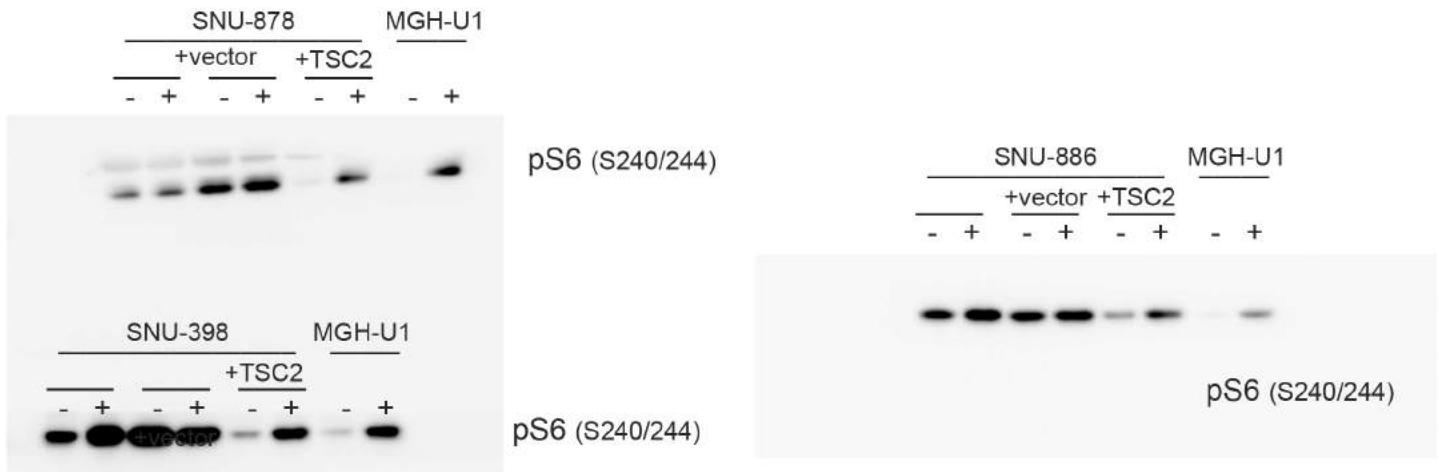

super signal west pico chemiluminescent after 5 min.

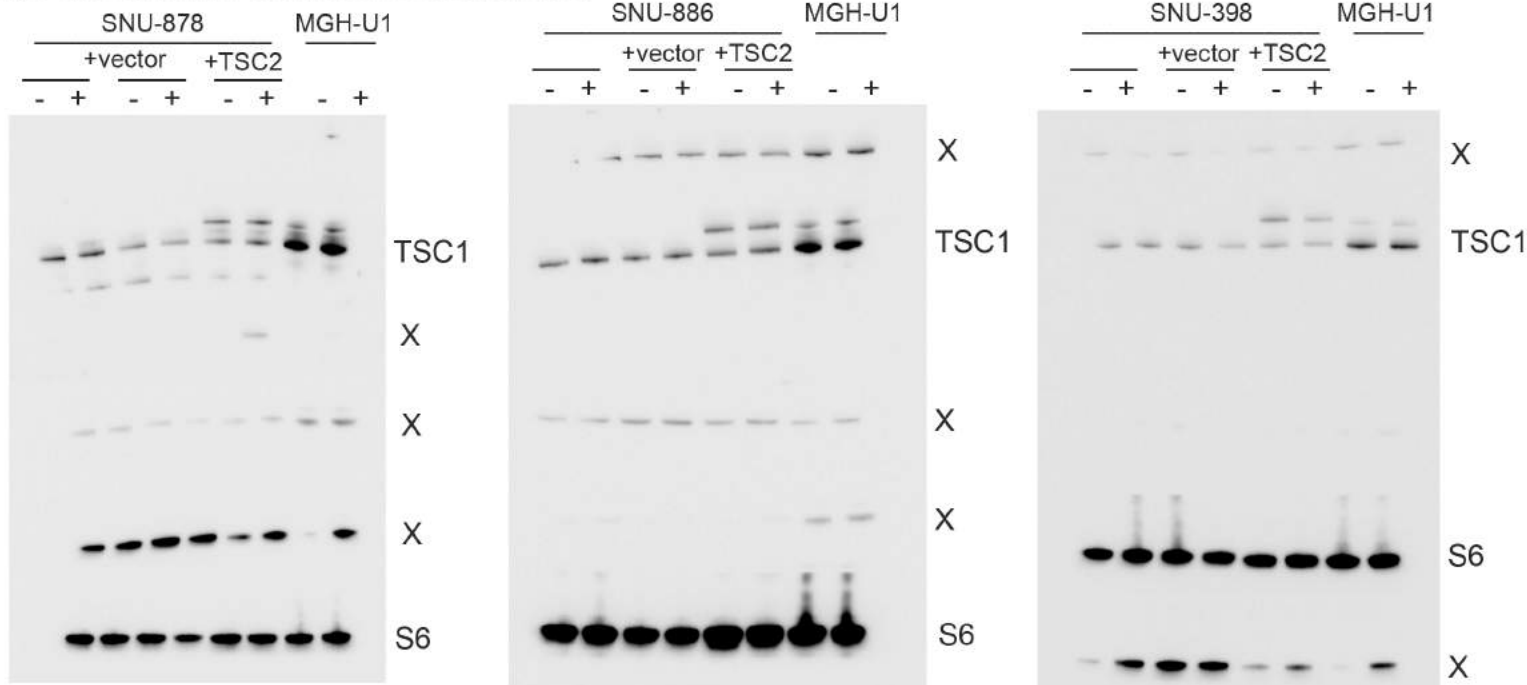

Figure 4

super signal west femto chemiluminescent after 3 min.

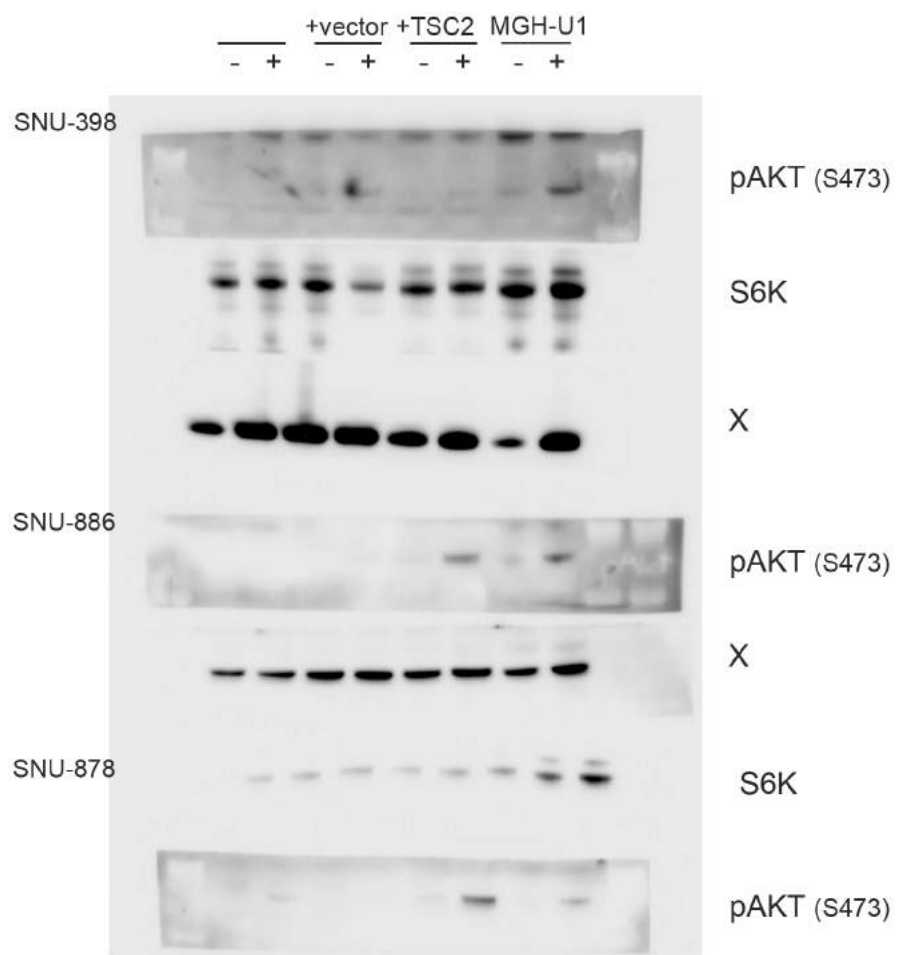

super signal west femto chemiluminescent after 1 min.  
membranes blotted second time

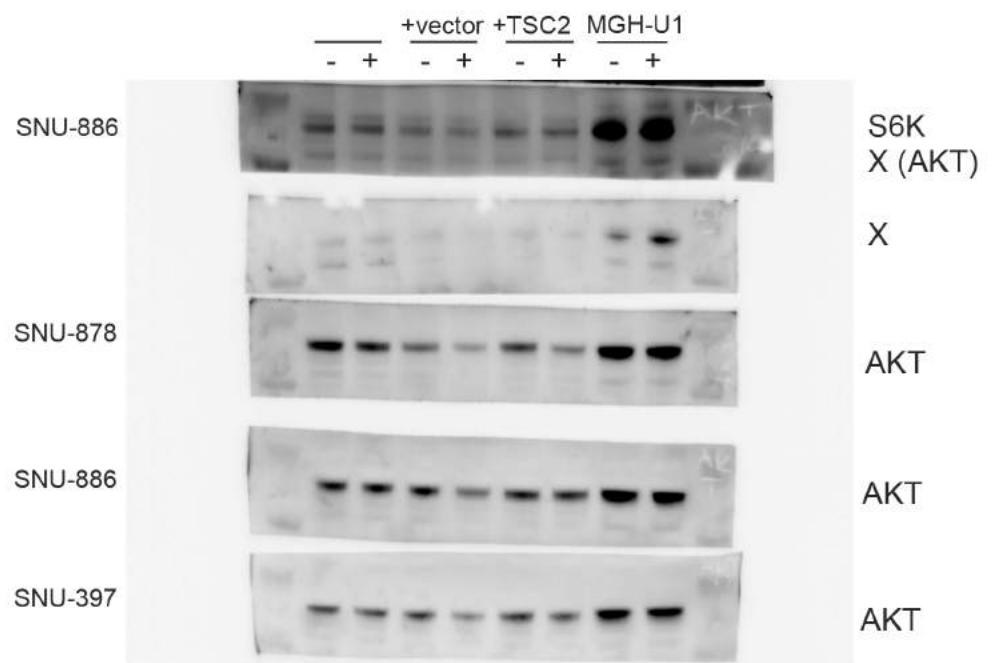

**Figure 5**  
 super signal west pico chemiluminescent  
 after 3 min.

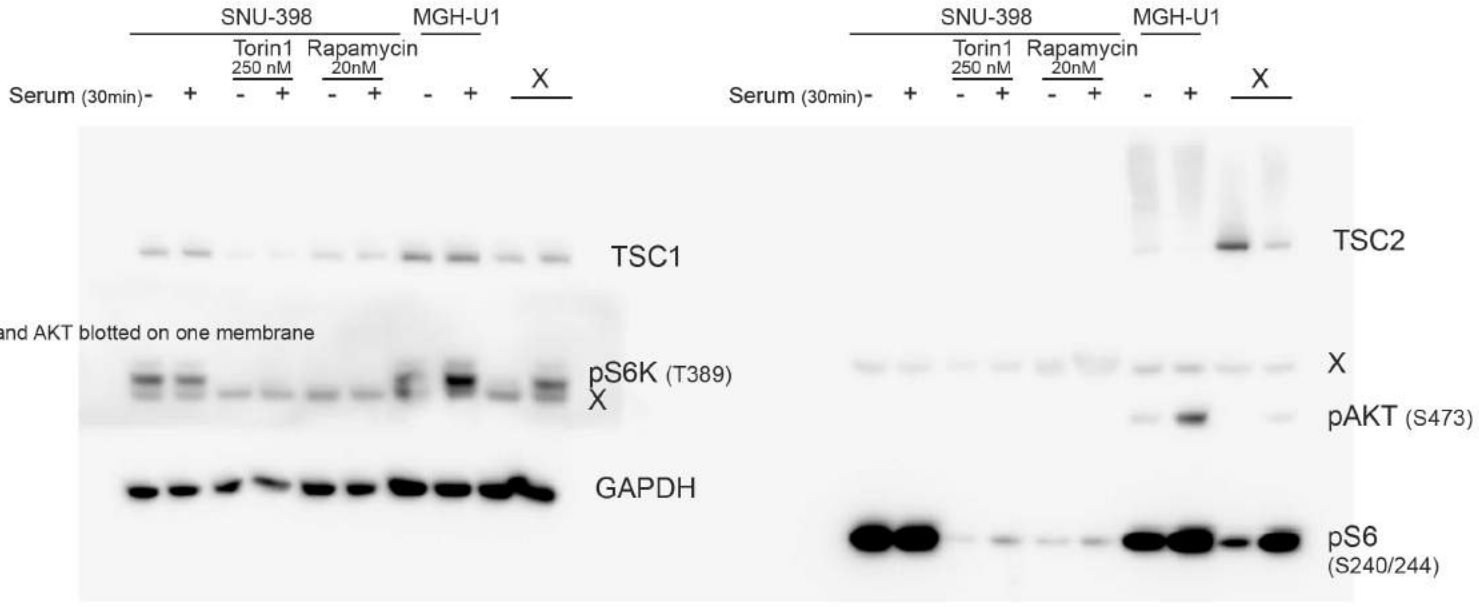

super signal west pico chemiluminescent  
 after 5 min.

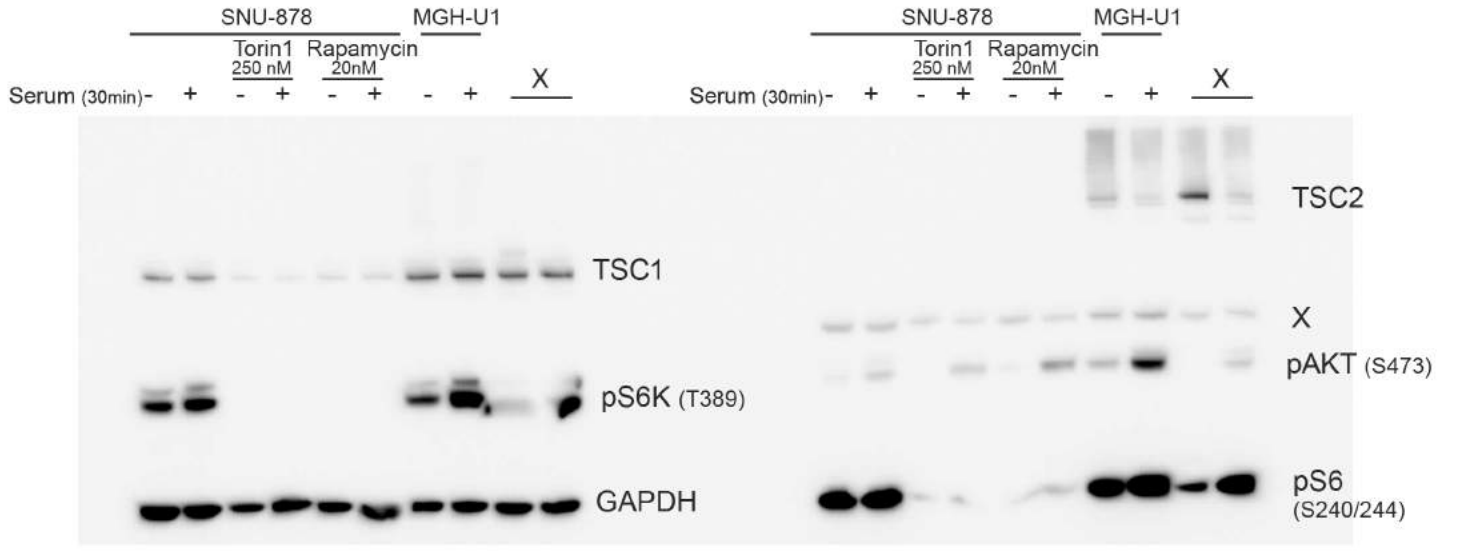

super signal west pico chemiluminescent  
 after 5 min.

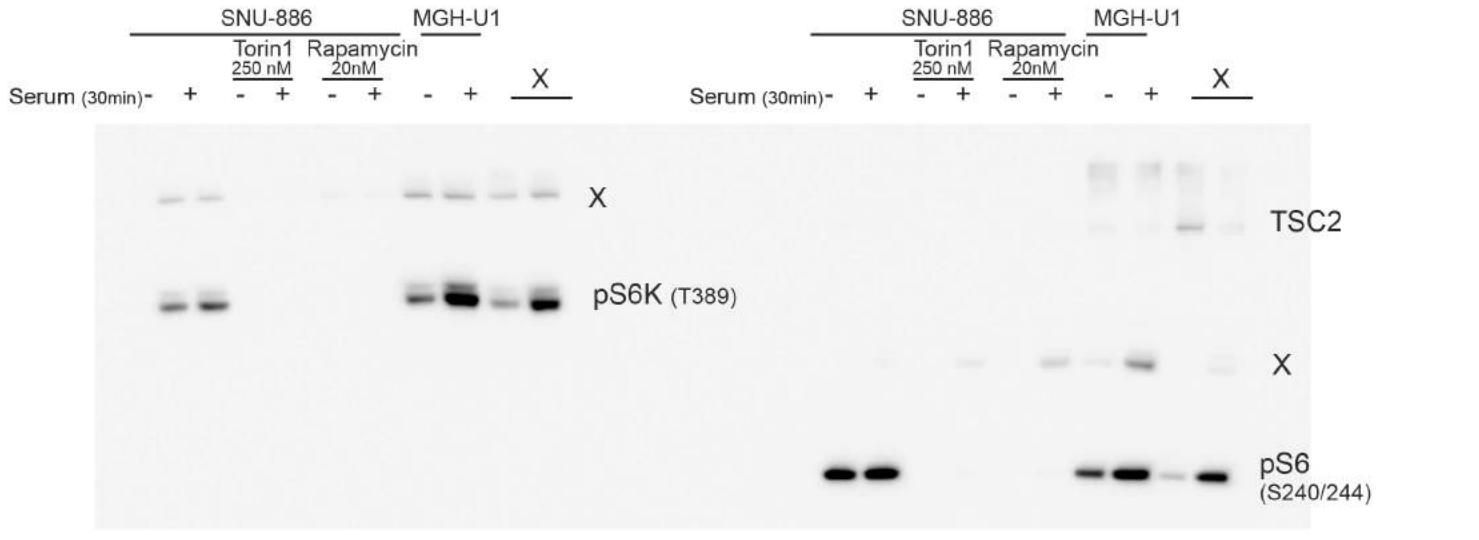

Figure 5

super signal west femto chemiluminescent after 2 min.

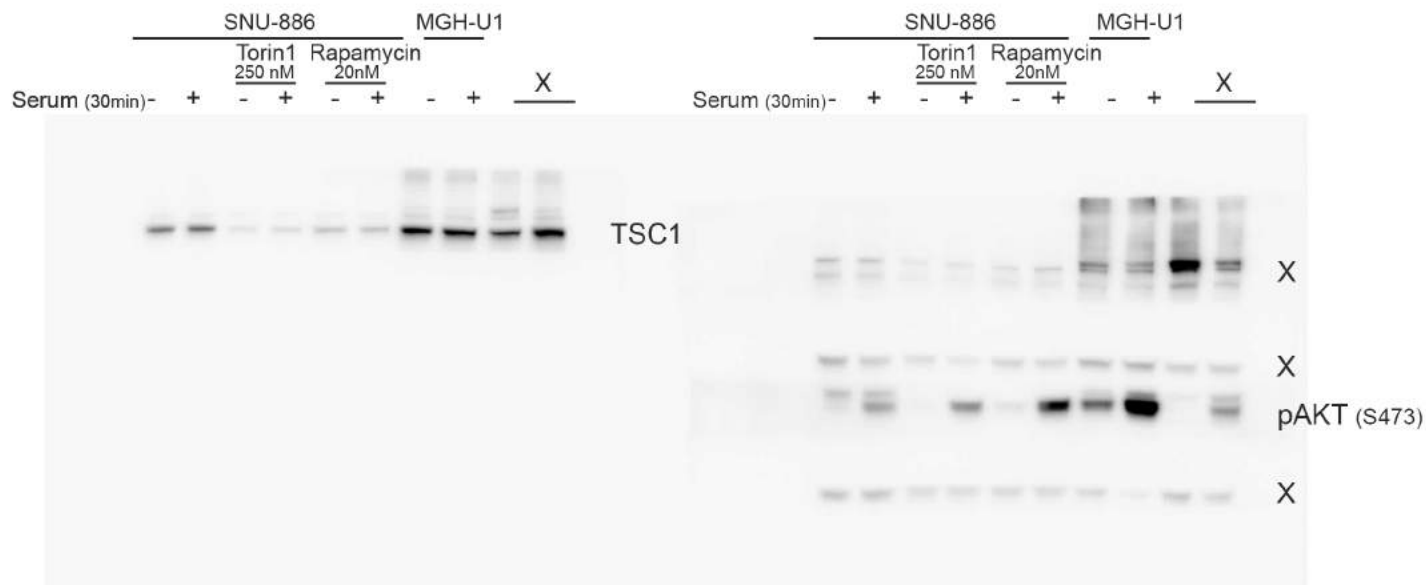

super signal west pico chemiluminescent after 5 min.

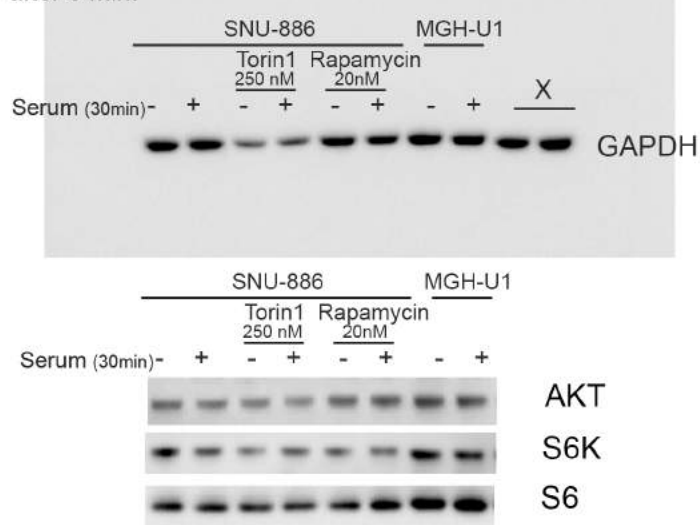

super signal west femto chemiluminescent after 3 min. Membranes blotted second time

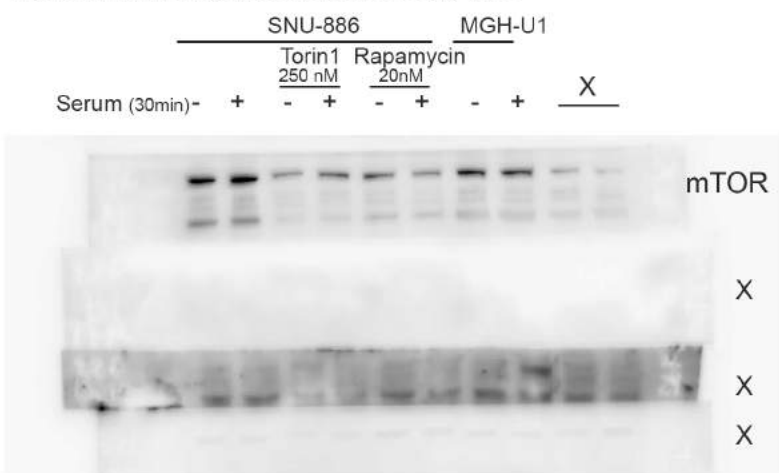

super signal west pico chemiluminescent after 5 min.

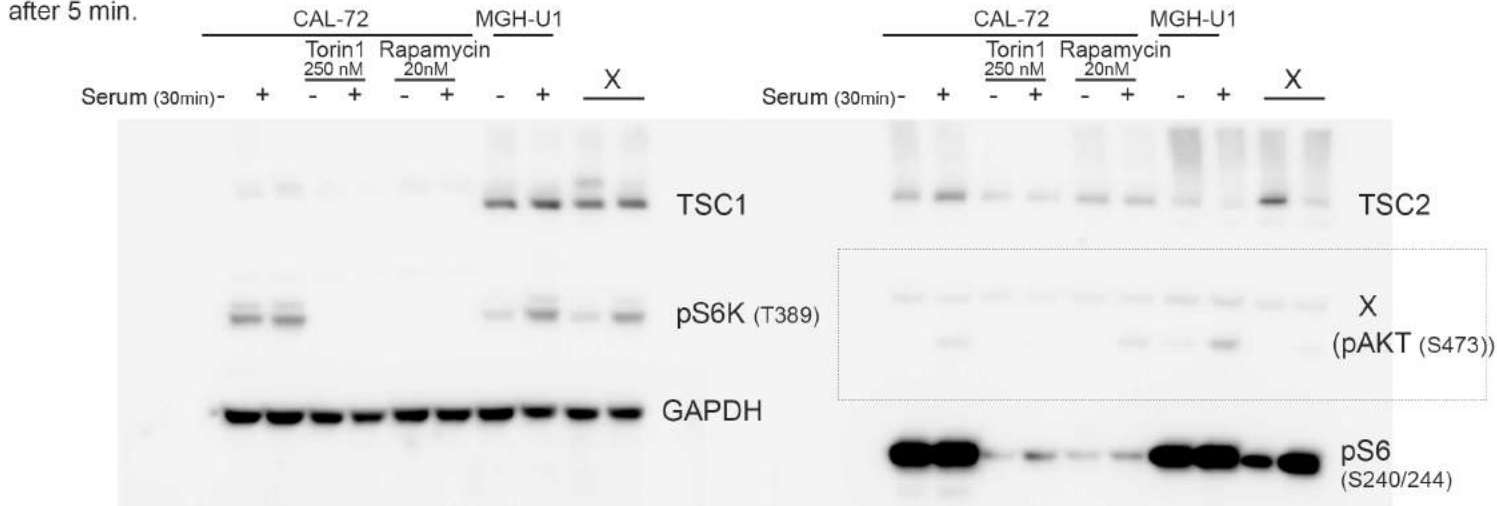

super signal west femto chemiluminescent after 3 min.

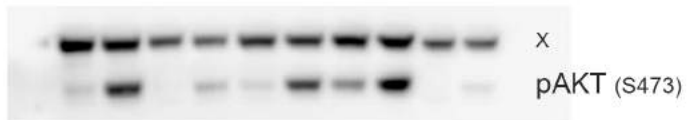



**Figure 5**

super signal west pico chemiluminescent  
after 5 min.  
membranes blotted second time

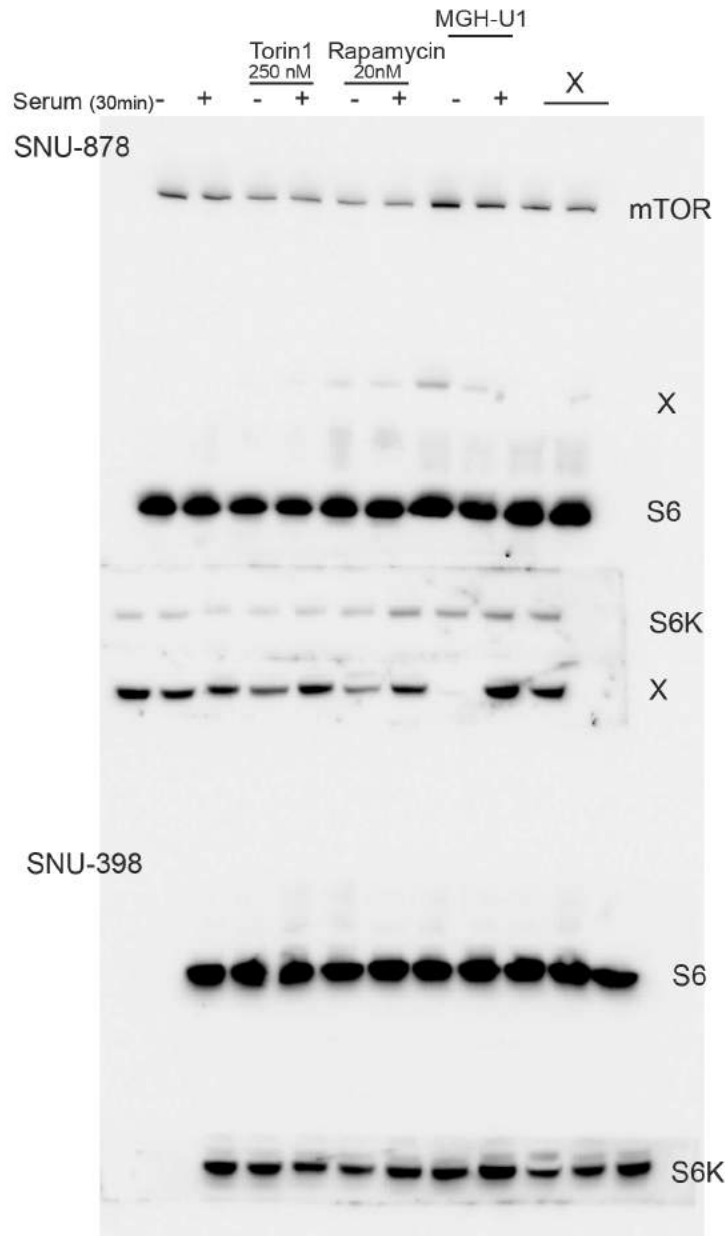

super signal west femto chemiluminescent  
after 2 min.  
membranes blotted second time

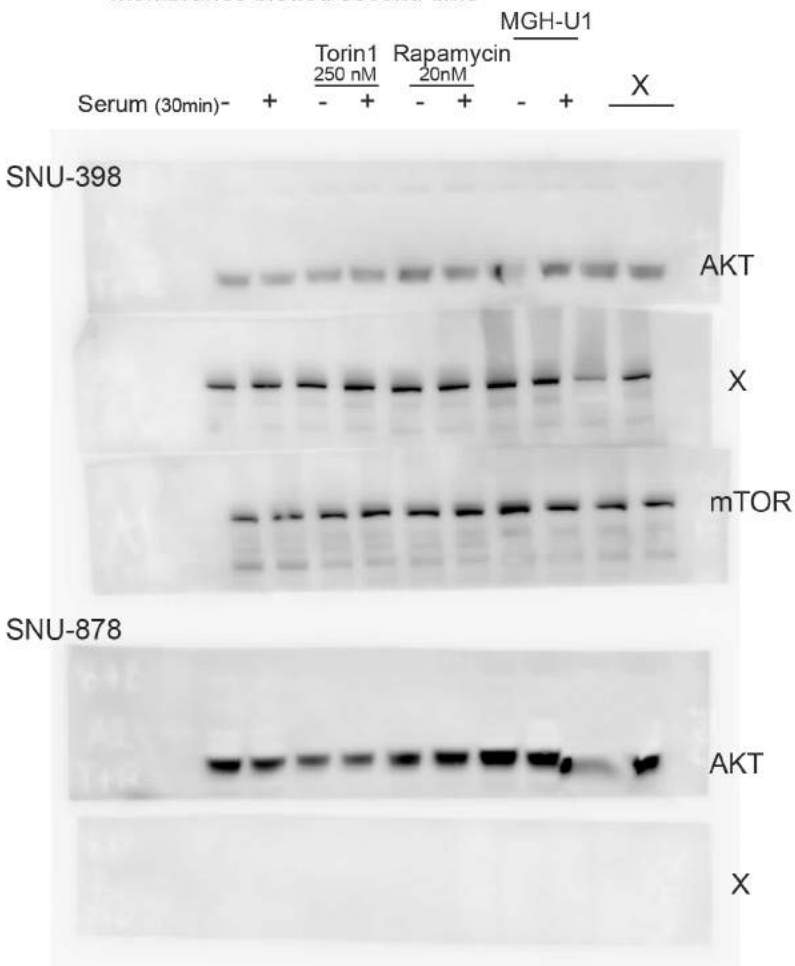

super signal west femto chemiluminescent  
after 30 sec.  
membranes blotted second time

super signal west femto chemiluminescent after 2 min.  
membranes blotted second time

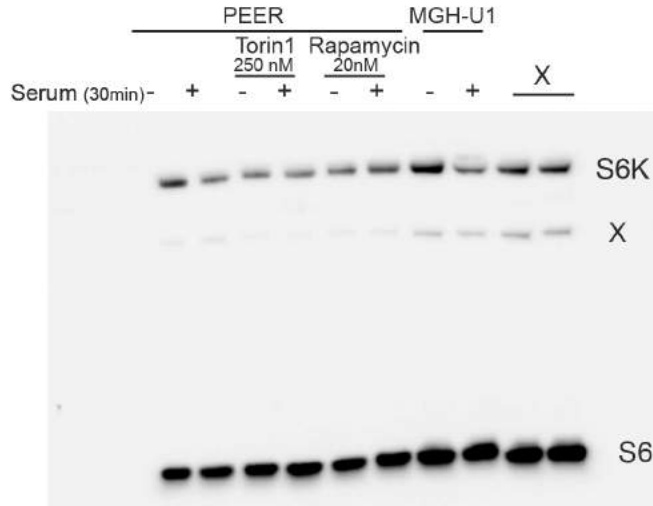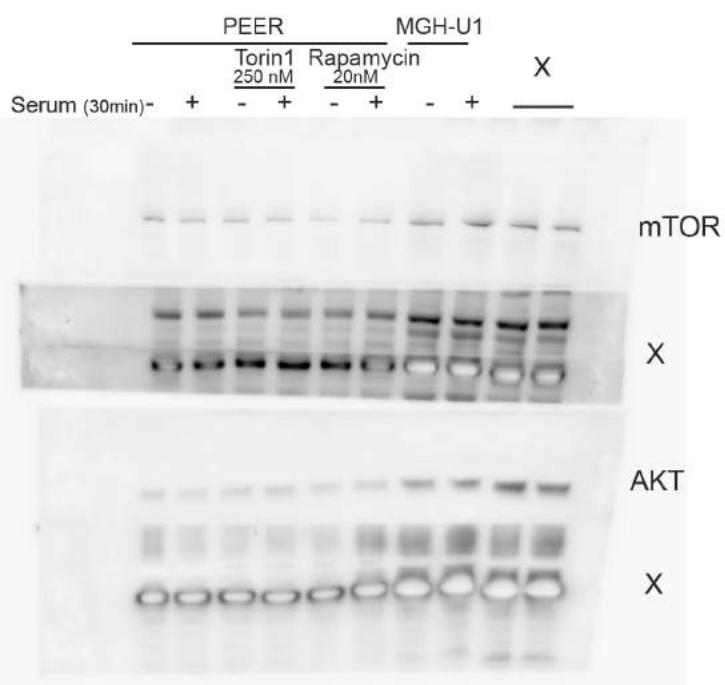

Figure 5

super signal west pico chemiluminescent after 1 min.

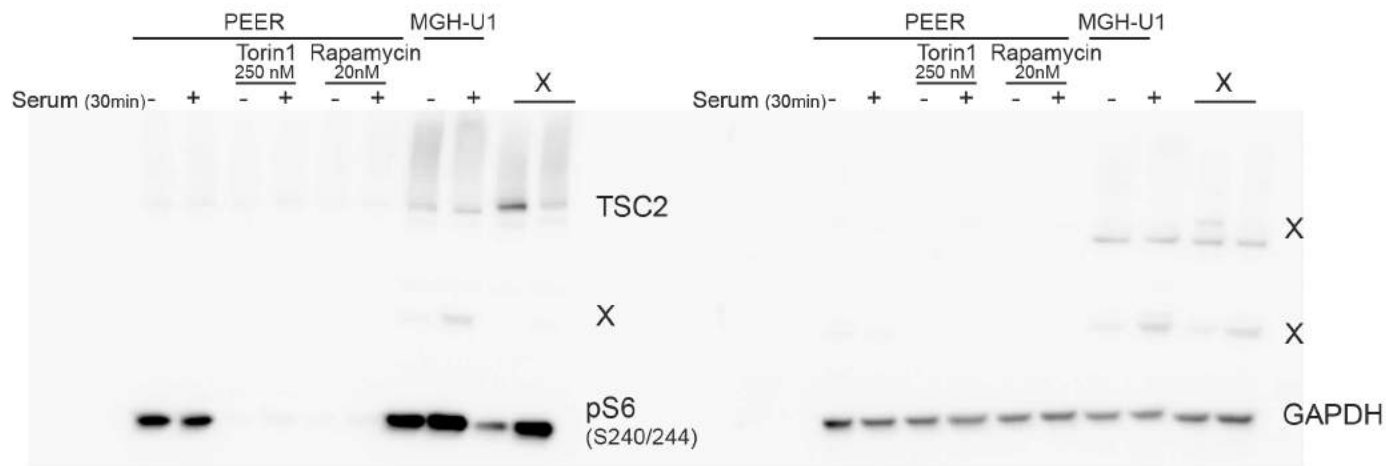

super signal west femto chemiluminescent after 2 min.

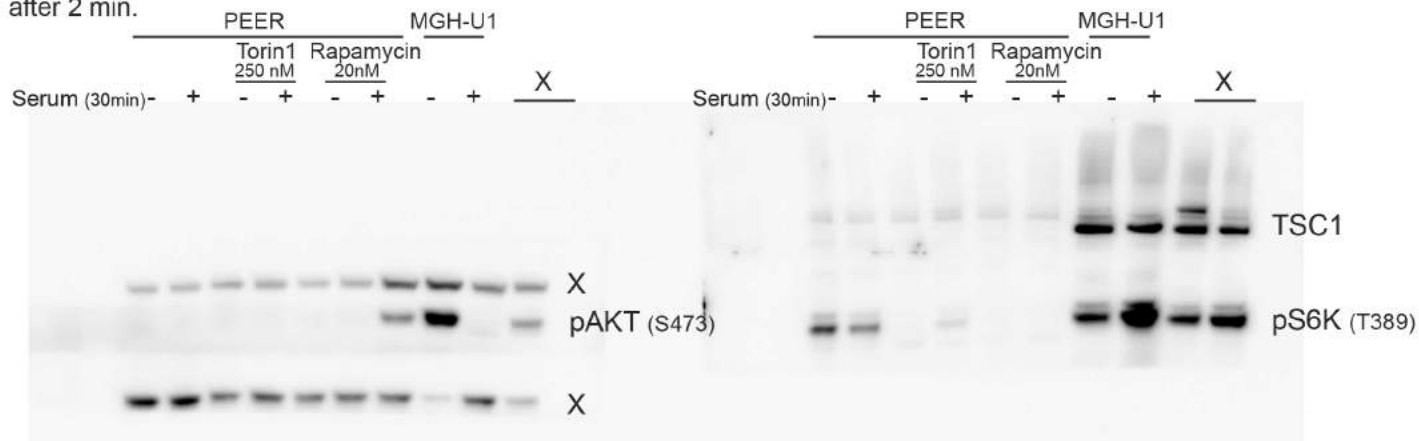

super signal west pico chemiluminescent after 1 min.  
membranes blotted second time

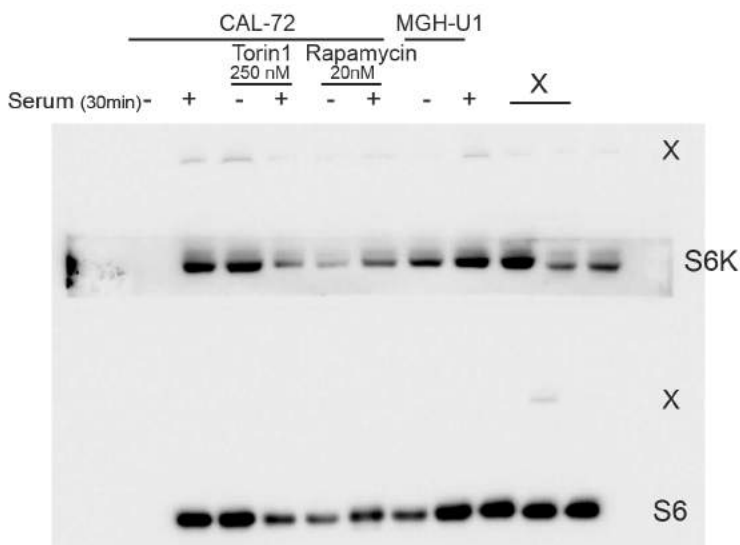

super signal west femto chemiluminescent after 30 sec.  
membranes blotted second time

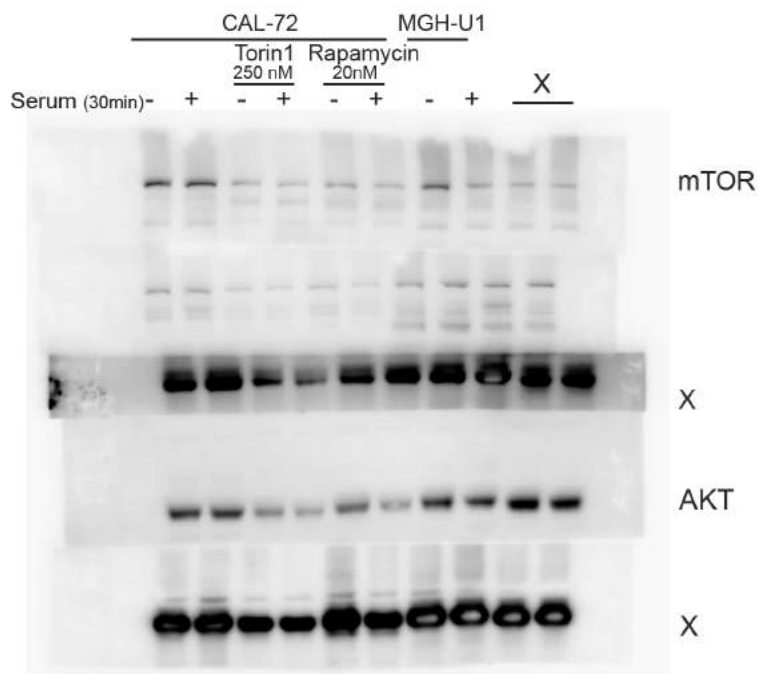

Figure 6

super signal west femto chemiluminescent after 3 min. (mTOR, AKT), super signal west pico chemiluminescent (GAPDH, pS6)

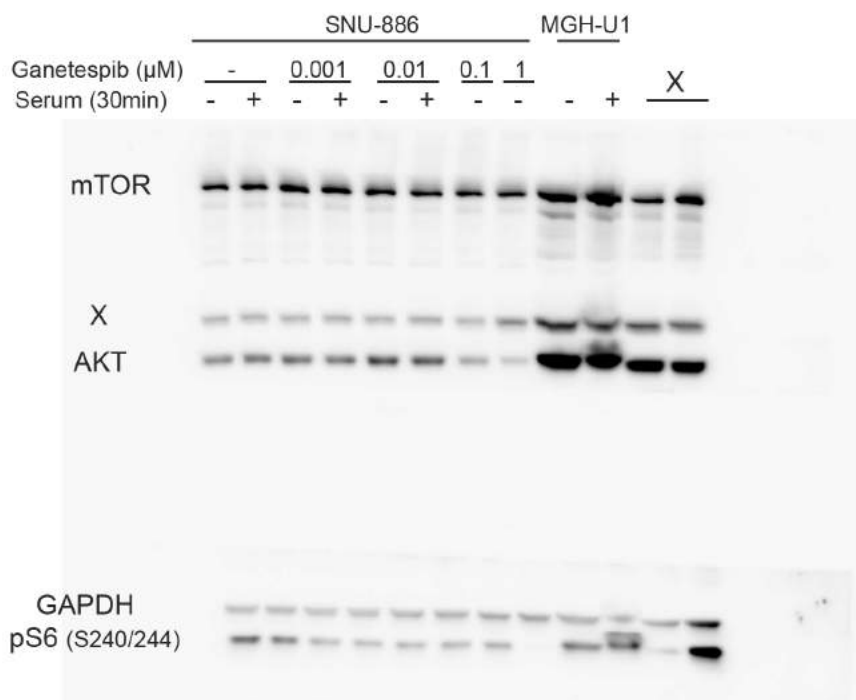

super signal west femto chemiluminescent after 3 min. (mTOR, AKT), super signal west pico chemiluminescent (GAPDH, pS6)

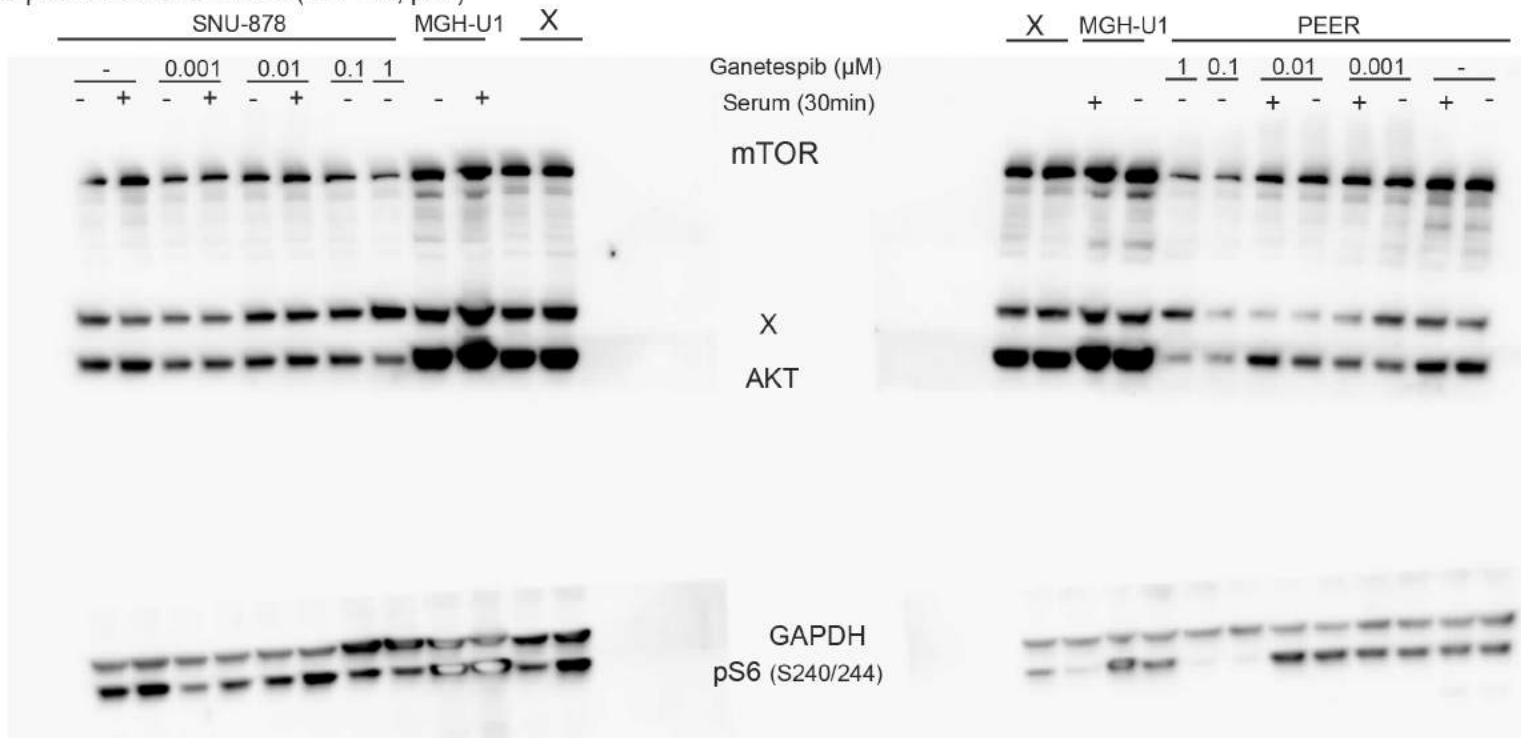

**Figure 6**

super signal west femto chemiluminescent after 1 min. (mTOR, AKT), super  
 signal west pico chemiluminescent (GAPDH, pS6)

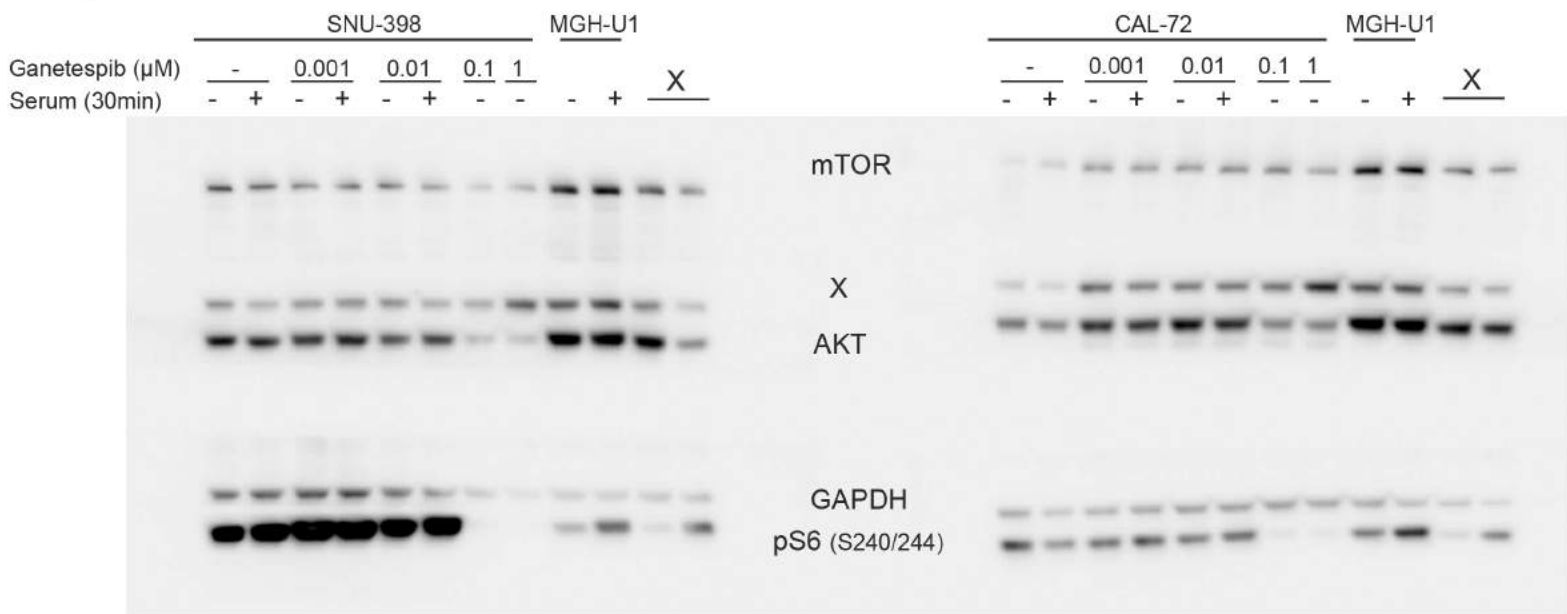



Figure 7  
super signal west pico chemiluminescent  
after 5 min.

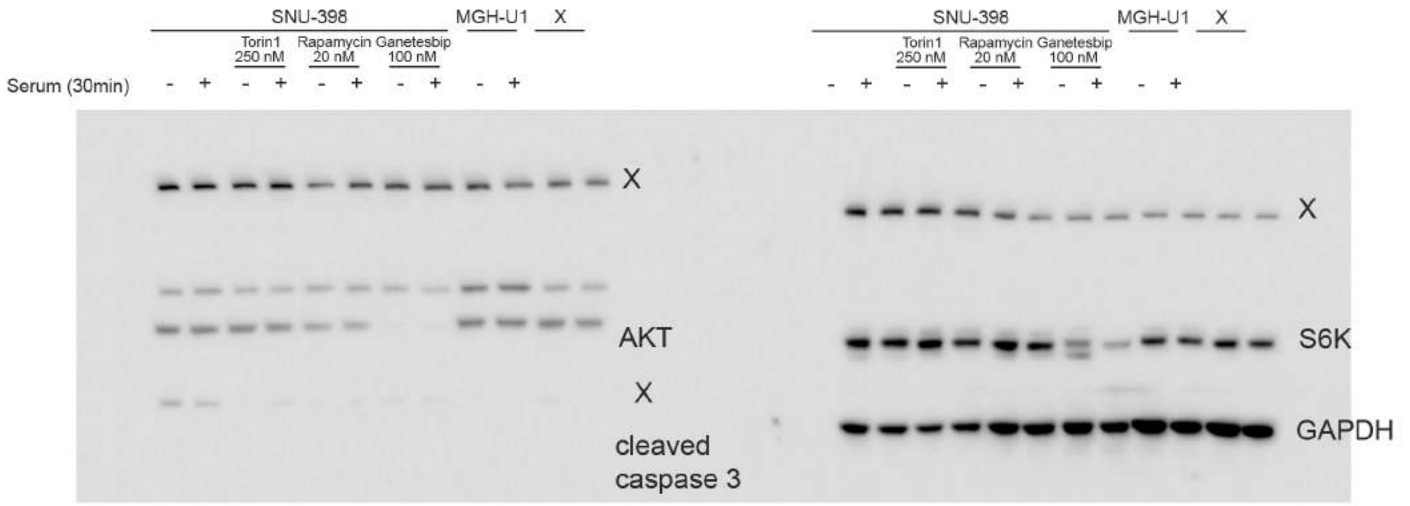

super signal west femto chemiluminescent  
after 3 min.

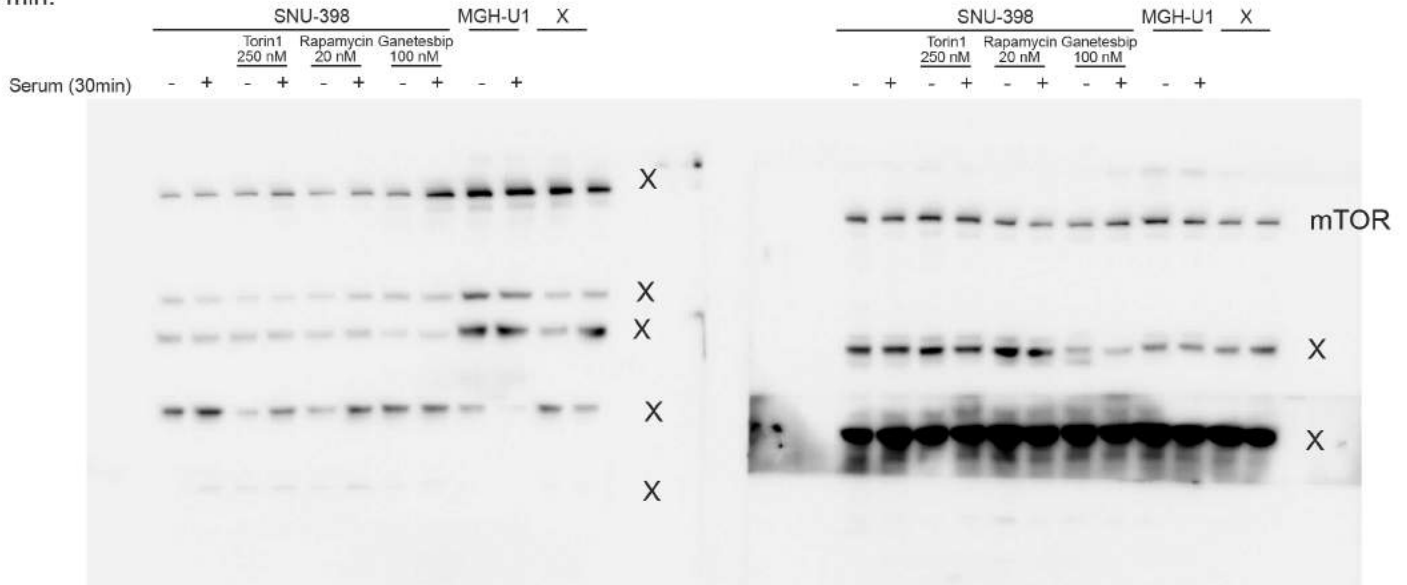

super signal west femto chemiluminescent  
after 1 min.

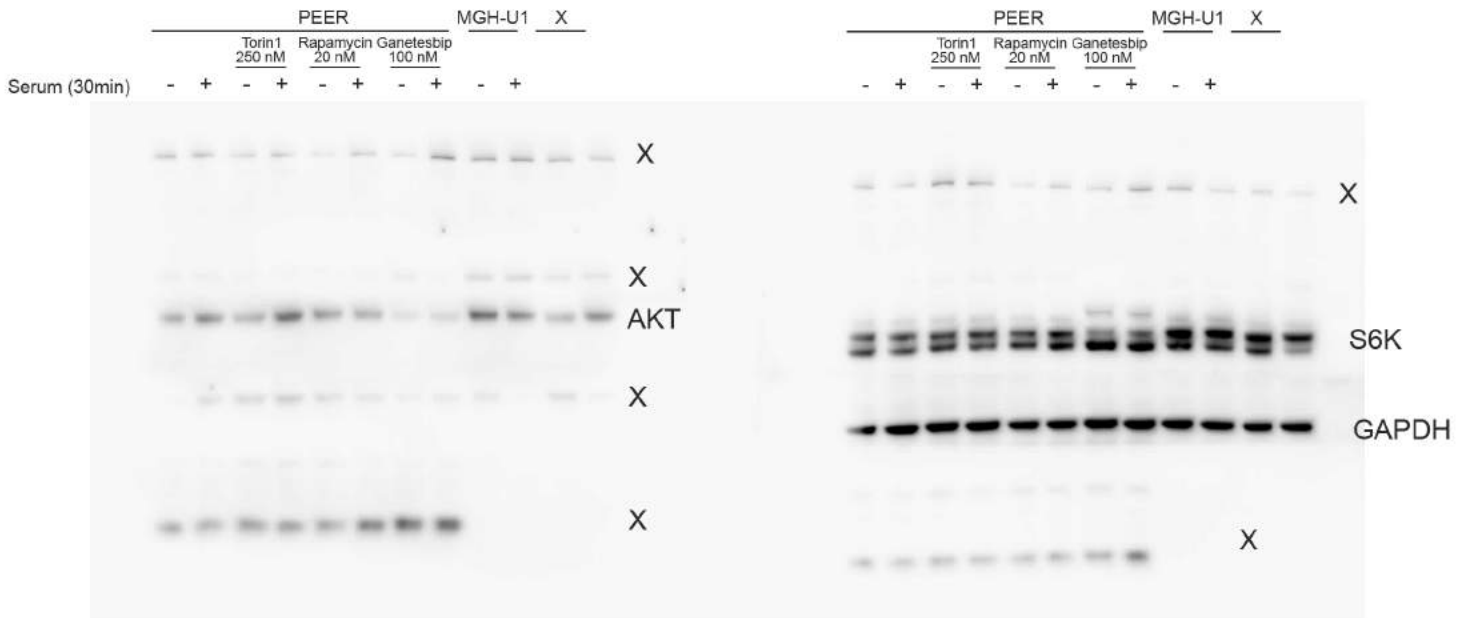

Figure 7  
super signal west femto chemiluminescent  
after 5 min.

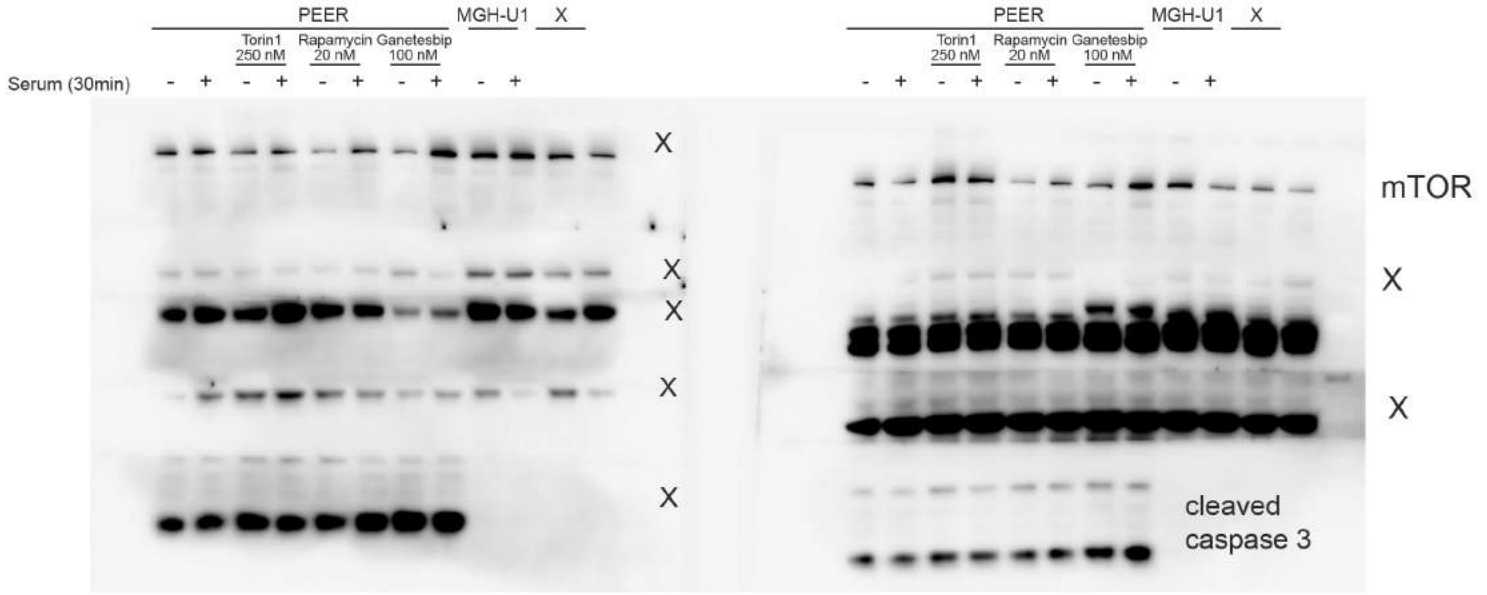

super signal west pico chemiluminescent  
after 3 min.

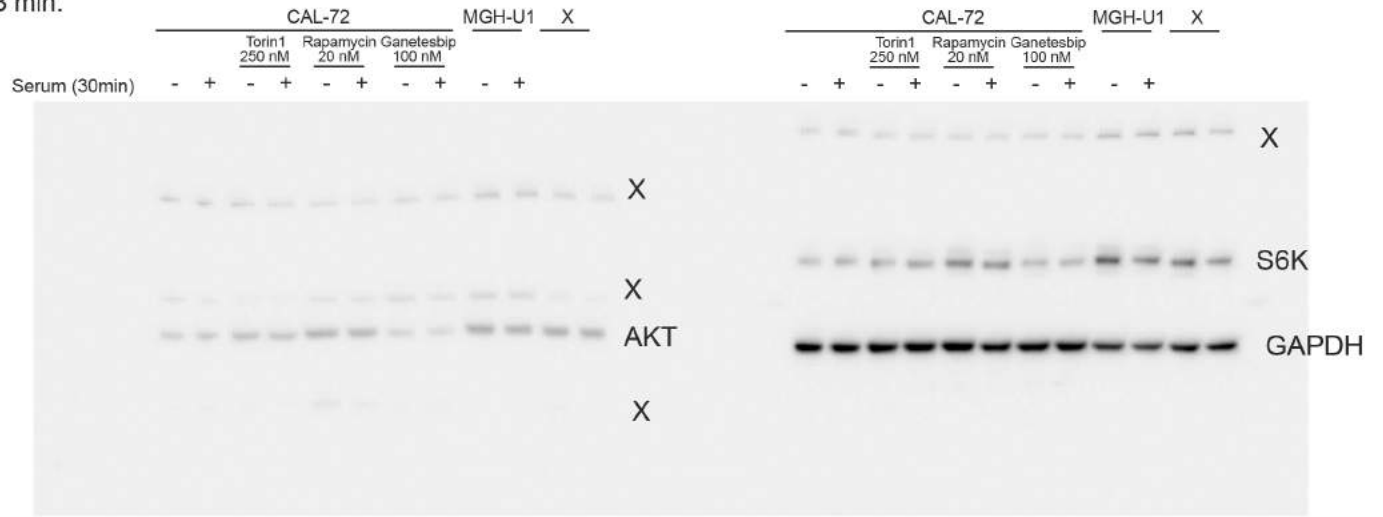

super signal west femto chemiluminescent  
after 3 min.

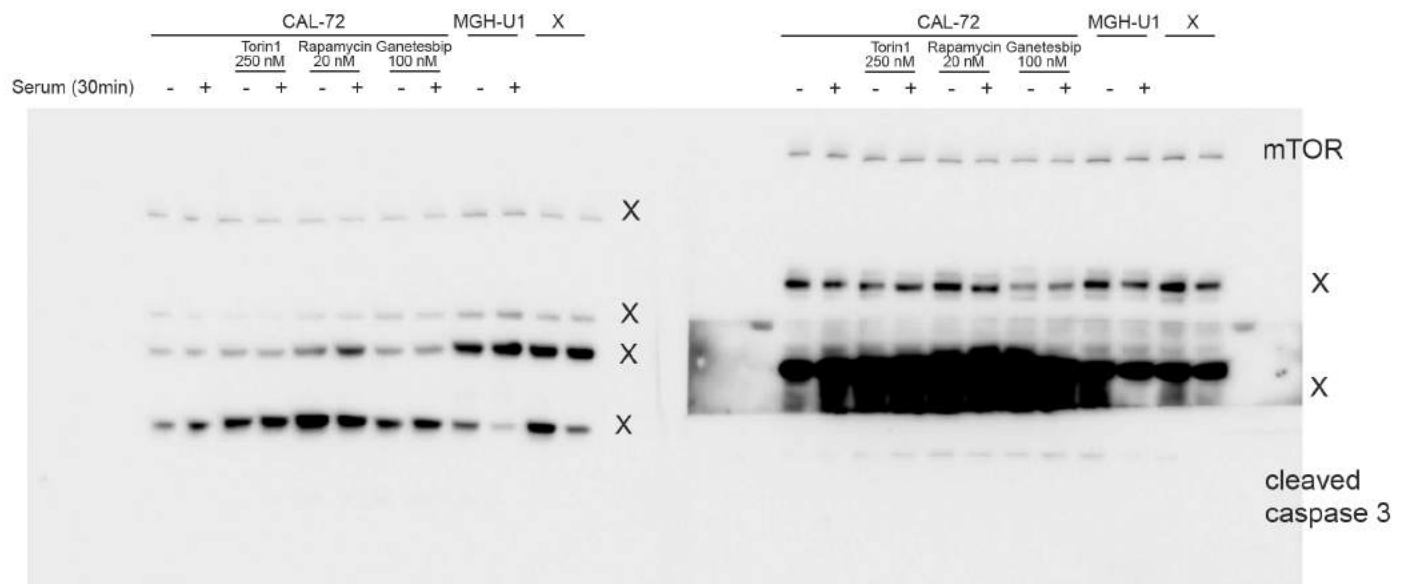

Figure 7

super signal west femto chemiluminescent  
after 3 min.; 15% gel  
flipped membrane ↔ !

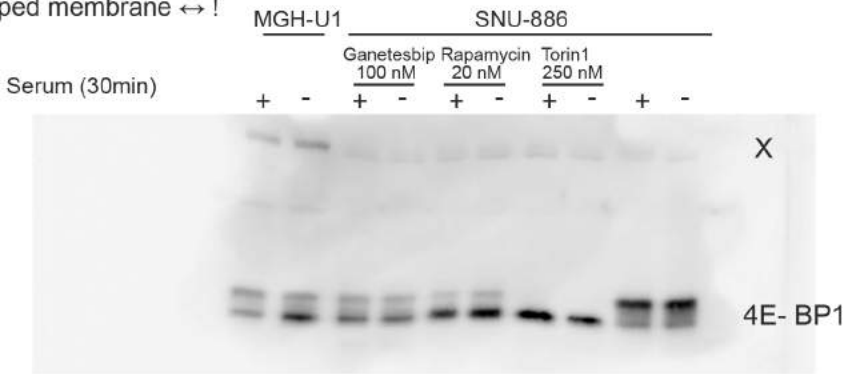

super signal west pico chemiluminescent  
after 3 min.  
stripped membranes

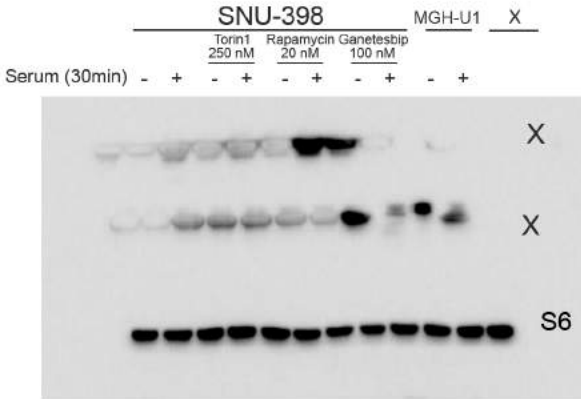

super signal west femto chemiluminescent  
after 2 min.; 15% gel  
flipped membranes ↔

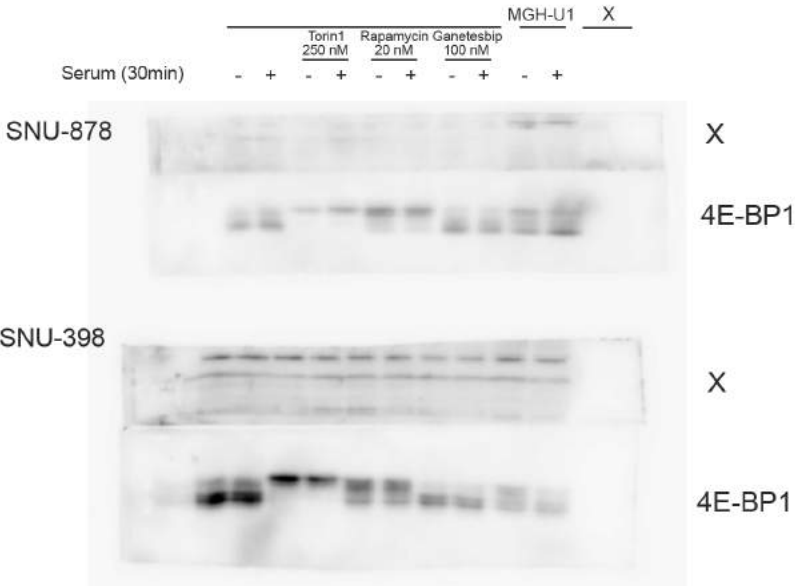

super signal west pico chemiluminescent  
after 1 min.  
stripped membranes

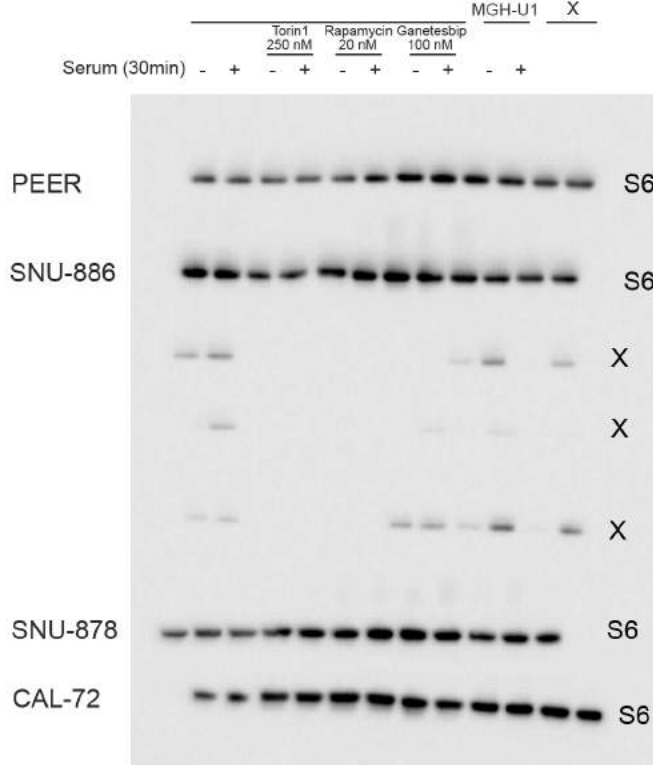

super signal west pico chemiluminescent  
after 2 min.; 15% gel  
flipped membranes ↔

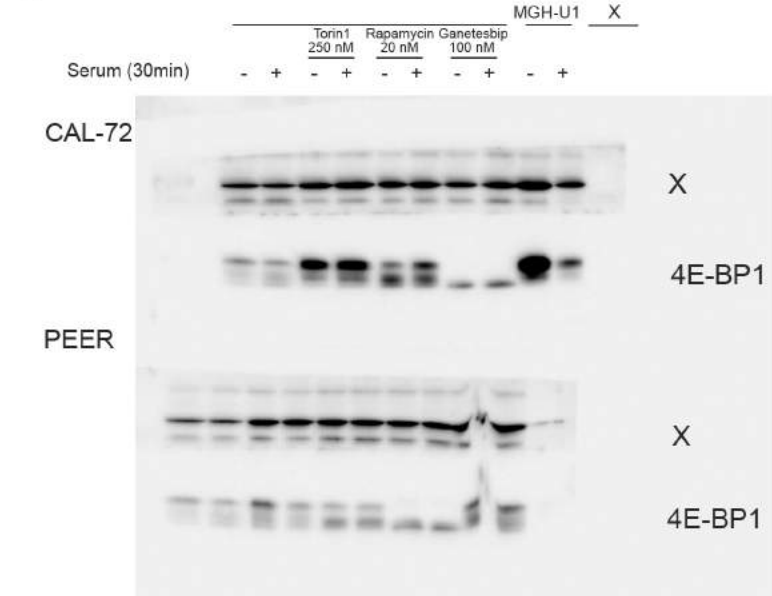



Figure 7

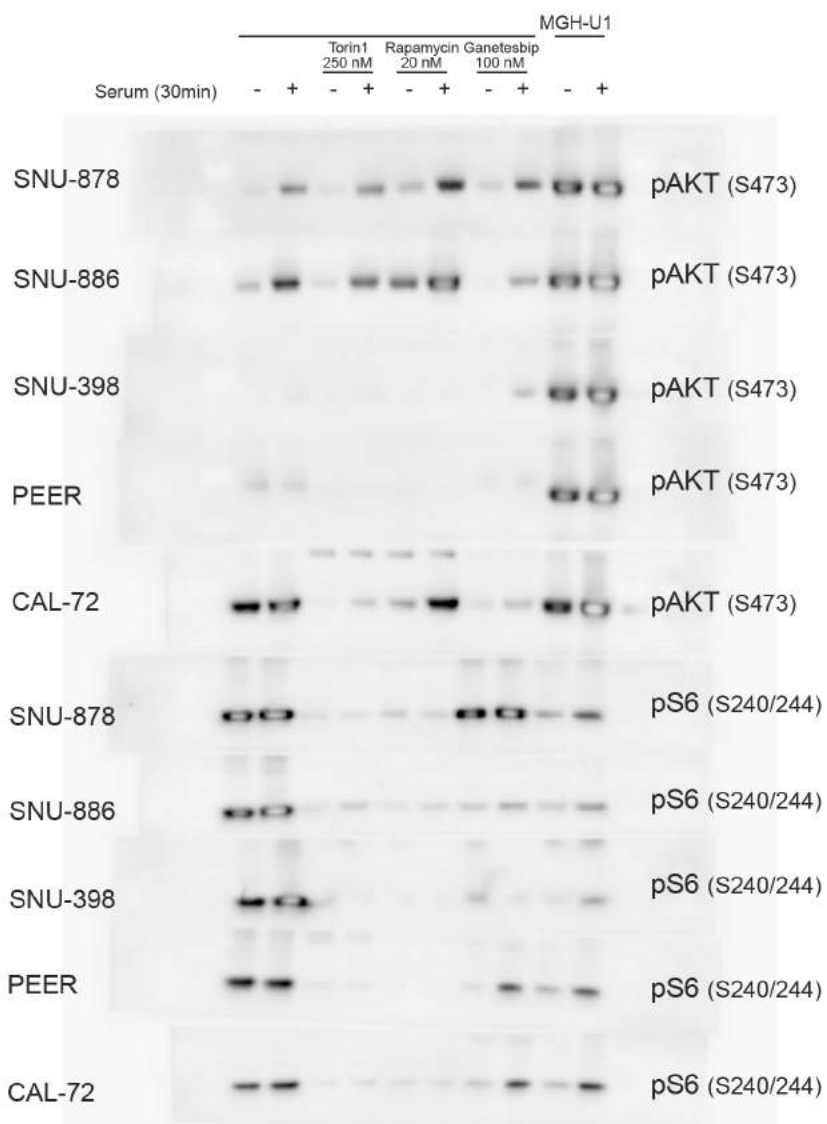

Figure 10

super signal west pico chemiluminescent after 5 min.

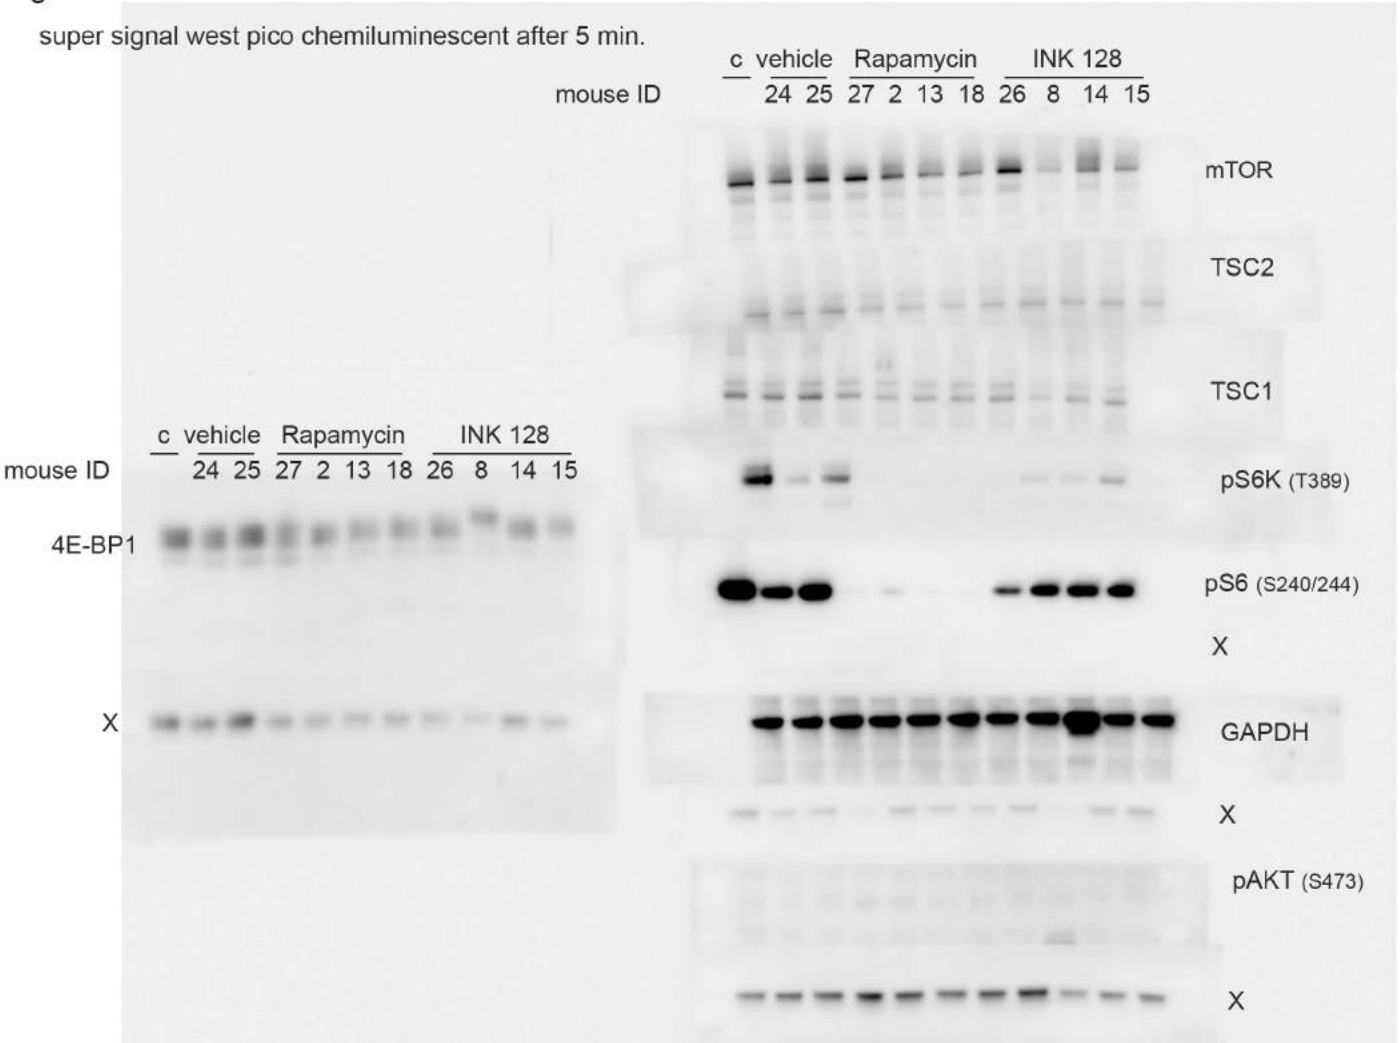

super signal west pico chemiluminescent after 2 min.

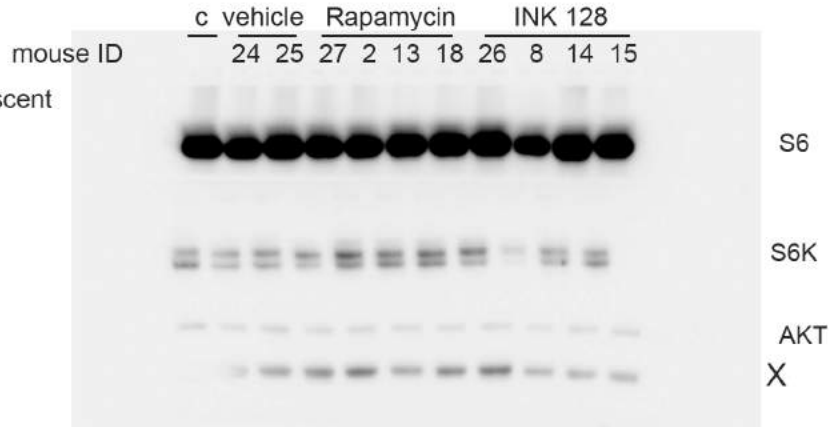

Figure 10

super signal west pico chemiluminescent,  
after 3 min.

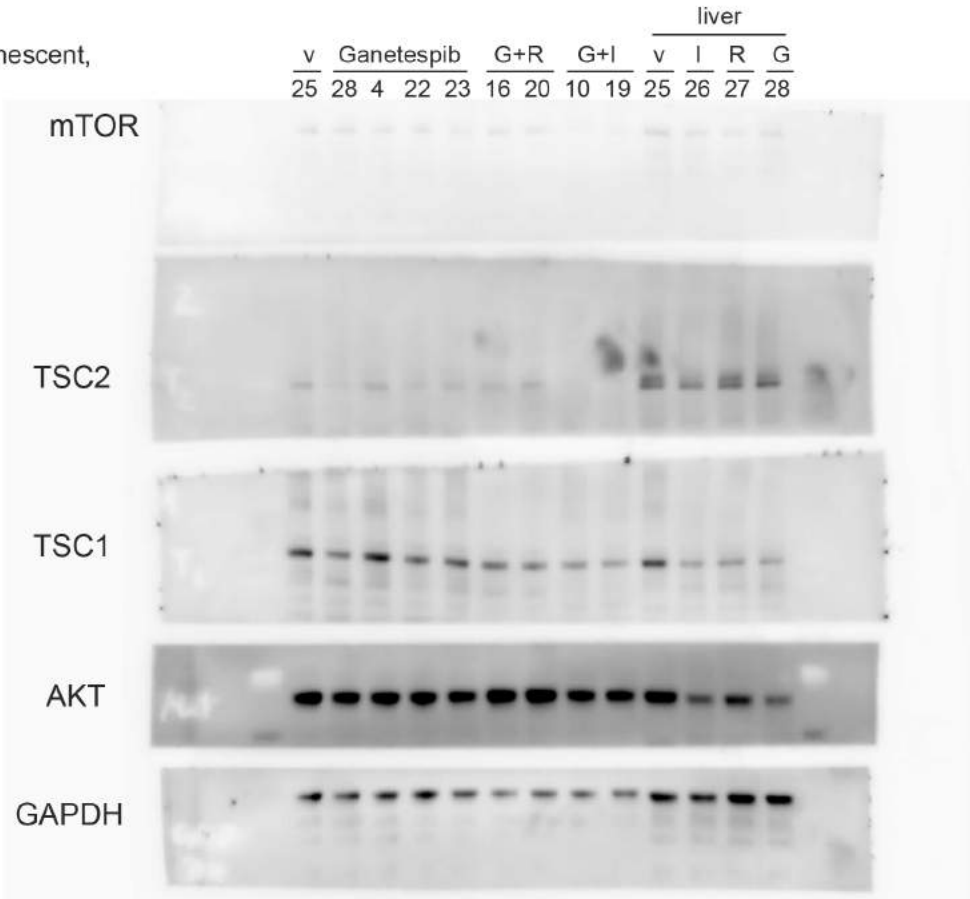

super signal west pico chemiluminescent,  
after 2 min.

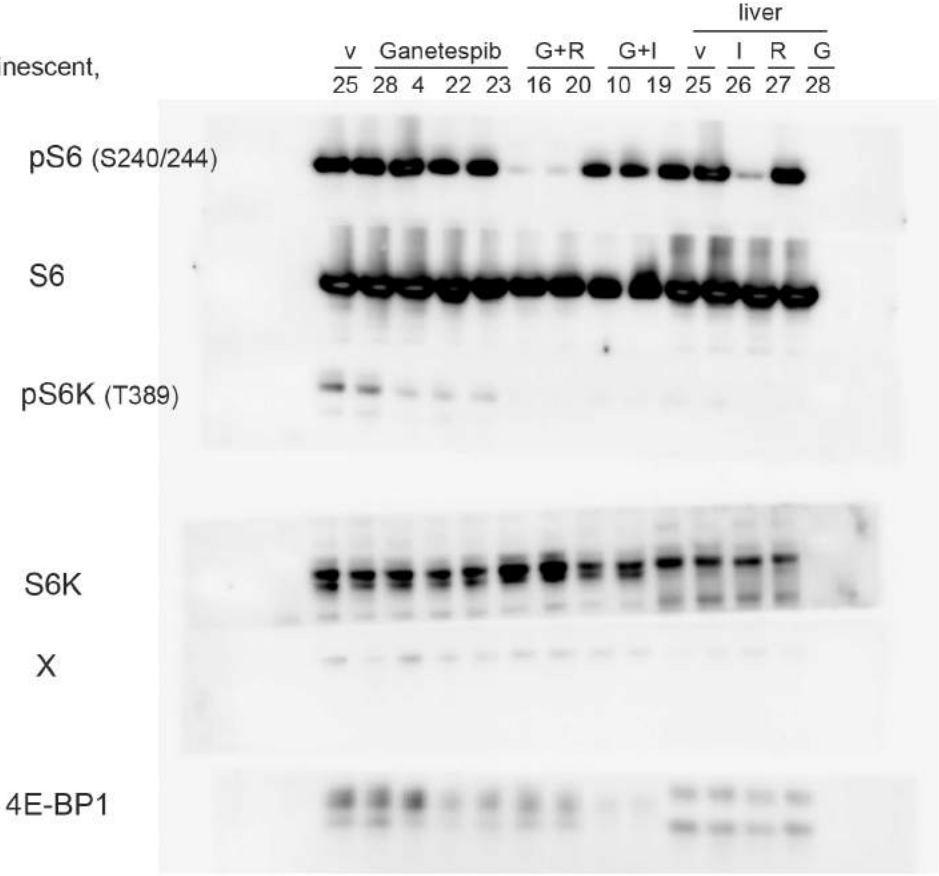

super signal west femto chemiluminescent,  
after 5 min.

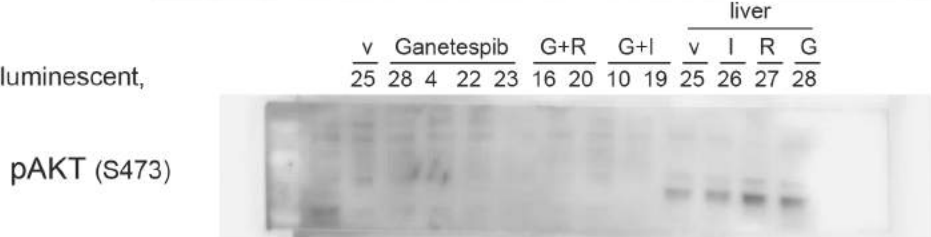

Supplement: pone.0248380.s001.pdf [file pone.0248380.s001.pdf]
