# Supplementary material for: Evaluation of Hsp90 and mTOR inhibitors as potential drugs for the treatment of TSC1/TSC2 deficient cancer
Source: PubMed Central journal article supplement (PMC8064564; doi:10.1371/journal.pone.0248380), 2021-04-23
Supplement: pone.0248380.s002.pdf [file pone.0248380.s002.pdf]

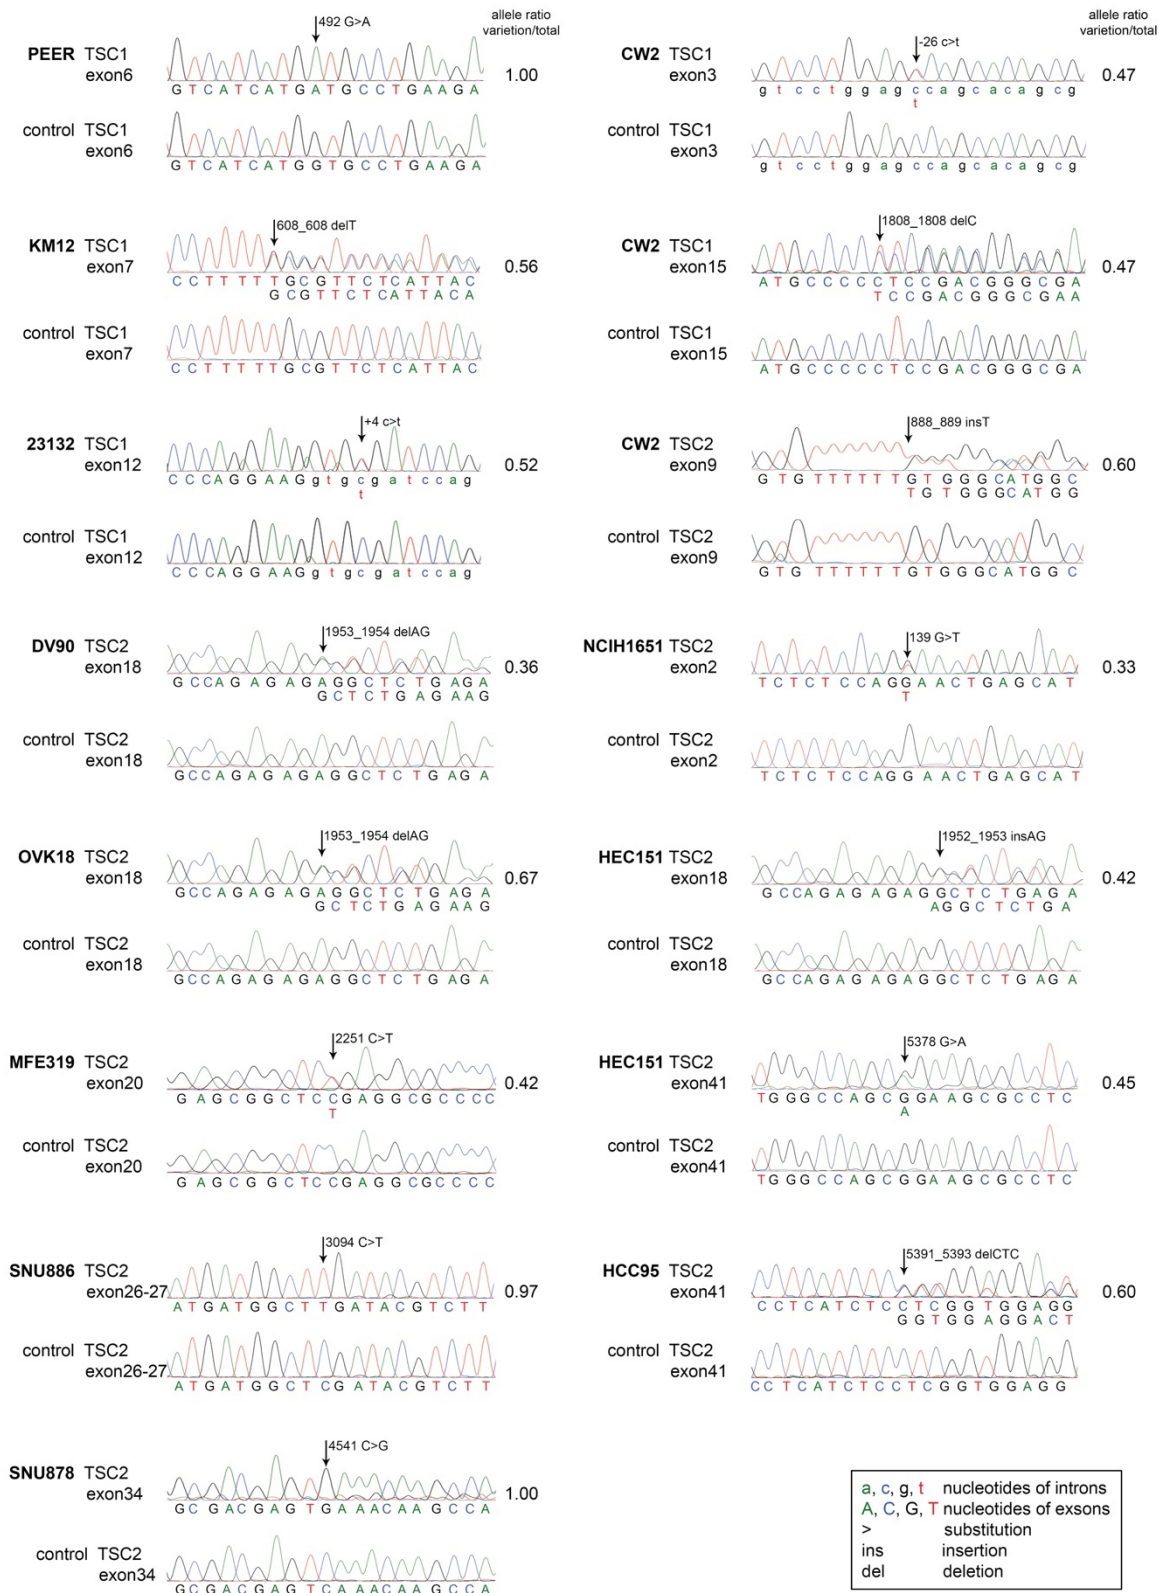

### S1 Fig. Confirmation of reported mutations by Sanger sequencing

Sequencing traces with mutation are shown, including a control for each sequenced region. PEER cells showed a homozygous nonsense mutation in TSC1 and SNU-878 and SNU-886 cells a homozygous nonsense mutation in TSC2. All other cell lines showed heterozygous mutations.

## Rapamycin (mTOR)

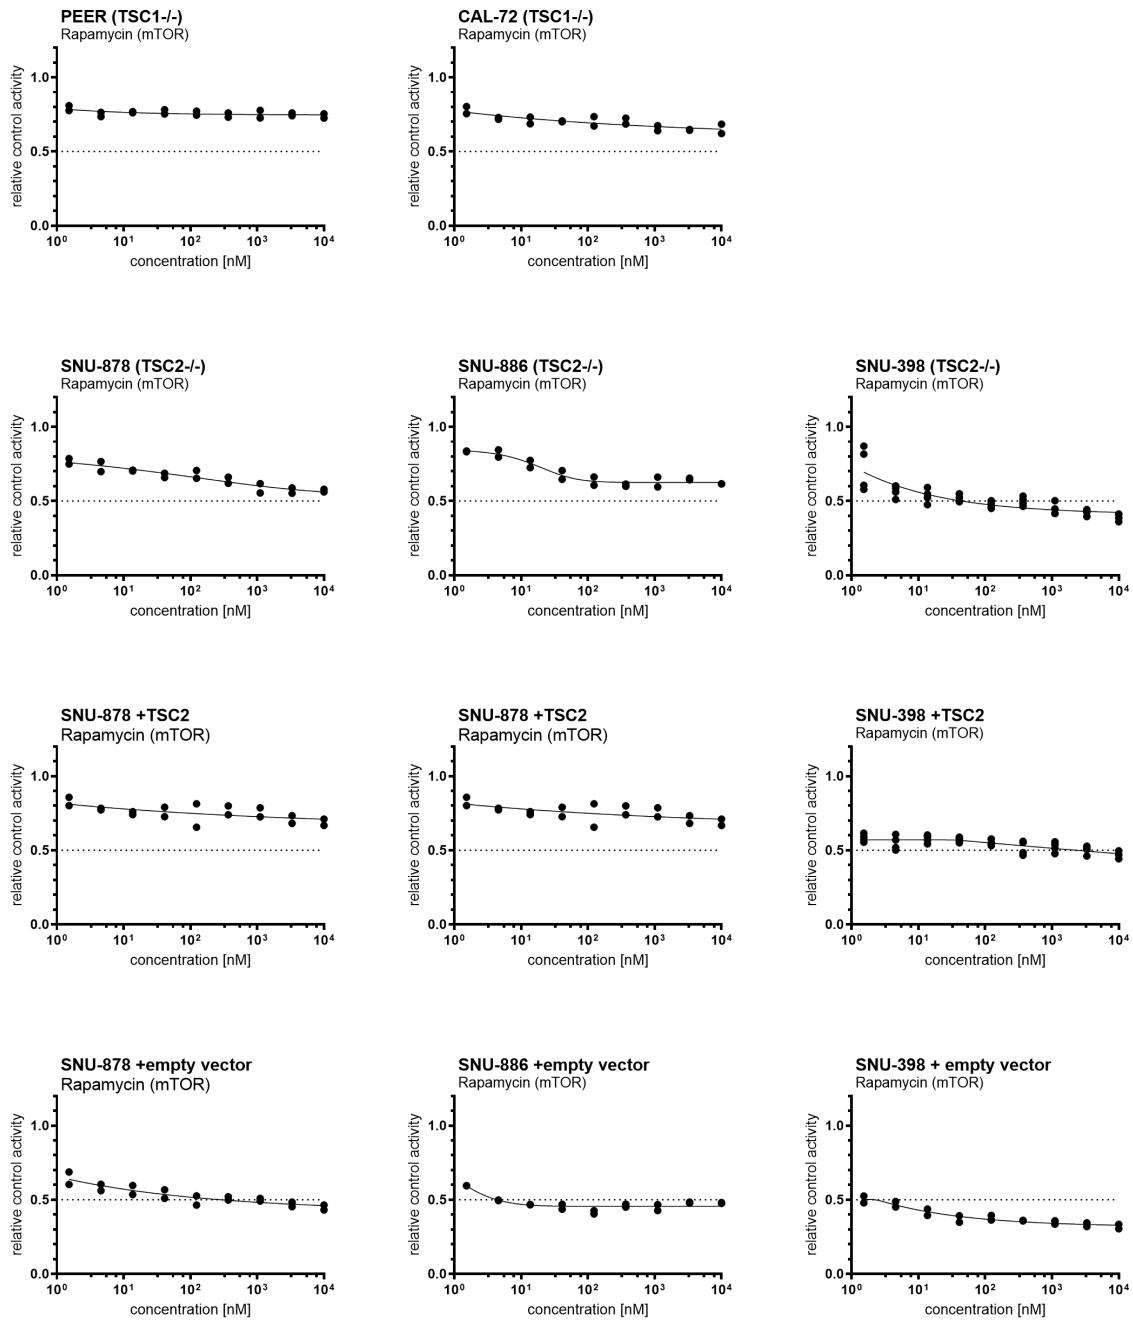

**S2 Fig. IC50 determination for Rapamycin**

Rapamycin was serially diluted three-fold from 10  $\mu$ M to 1.5 nM. Cell viability was determined 72h after treatment using CellTiter-Glo and XLfit4.0 software. Cell viability is shown relative to control, n = 2- 4. Rapamycin did not achieve IC50 over this dose range.

## WYE-125132 (mTOR)

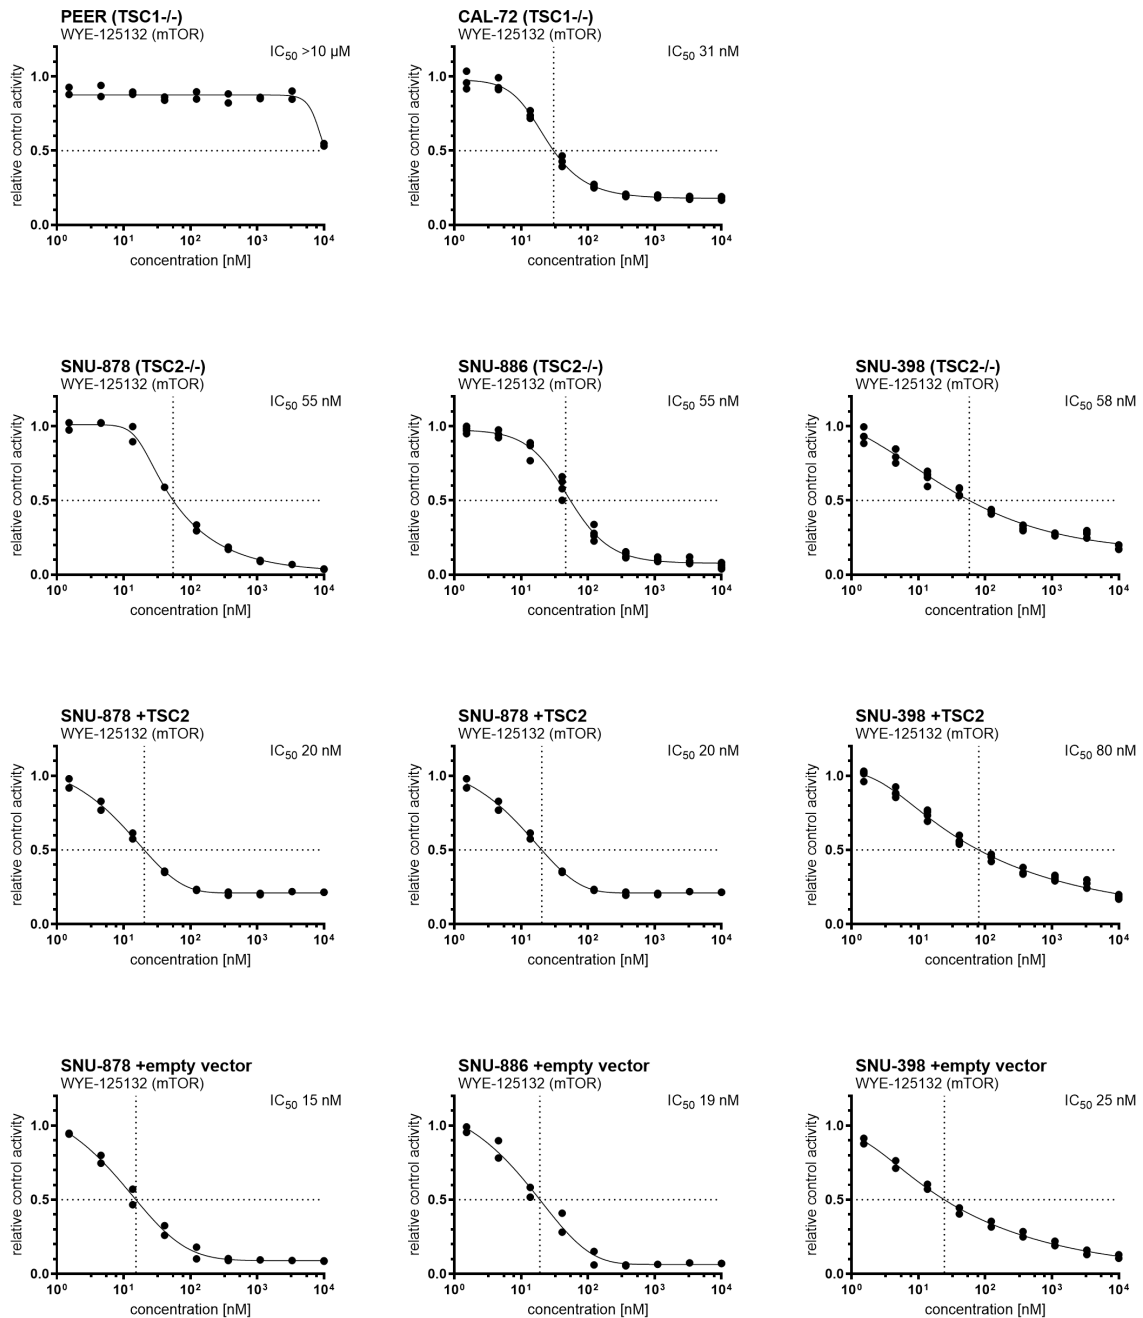

### S3 Fig. Cell viability after WYE-125132 treatment

WYE-125132 was serially diluted three-fold from  $10 \mu\text{M}$  to  $1.5 \text{ nM}$ . Cell viability was determined 72h after treatment using CellTiter-Glo and XLfit4.0 software. Cell viability is shown in relative control activity,  $n = 2-4$ .  $IC_{50}$  was calculated as the drug concentration that reduced cell viability by 50% compared to untreated cells. WYE-125132 is an mTORC1/2 inhibitor. The SNU cell lines and CAL-72 were very sensitive to all tested mTORC1/2 inhibitors.

## AZD8055 (mTOR)

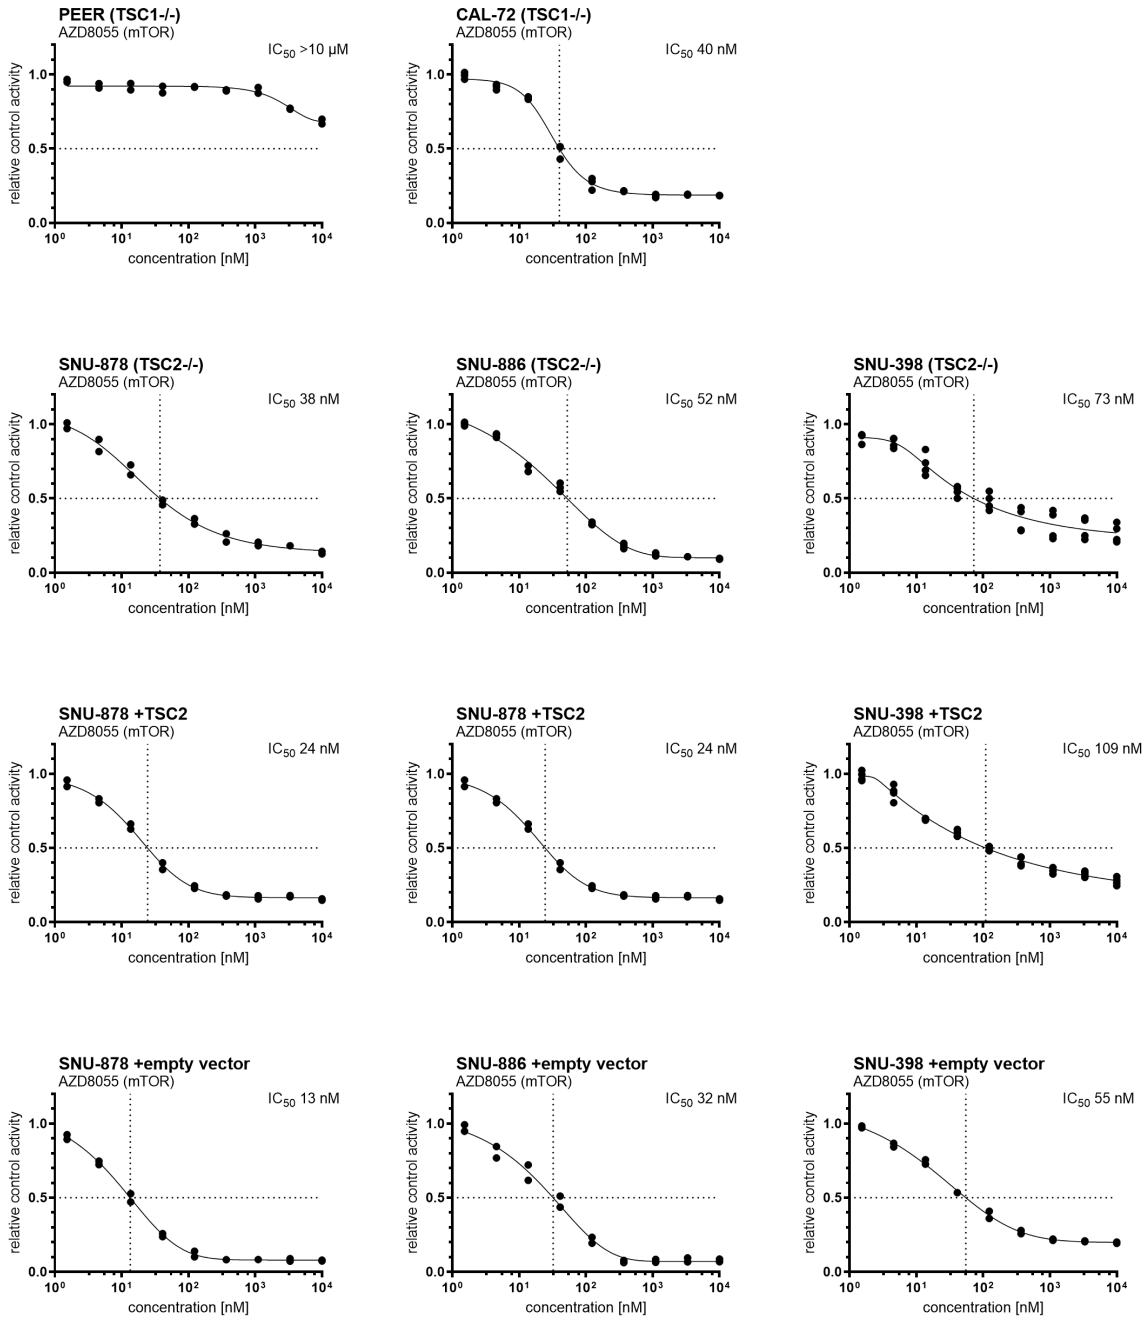

**S4 Fig. Cell viability after AZD8055 treatment**

AZD8055 was serially diluted three-fold from 10 μM to 1.5 nM. Cell viability was determined 72h after treatment using CellTiter-Glo and XLfit4.0 software. Cell viability is shown in relative control activity, n= 2-4. IC<sub>50</sub> was calculated as the drug concentration that reduced cell viability by 50% compared to untreated cells. AZD8055 is an mTORC1/2 inhibitor. The SNU cell lines and CAL-72 were very sensitive to all tested mTORC1/2 inhibitors.

## Torin1 (mTOR)

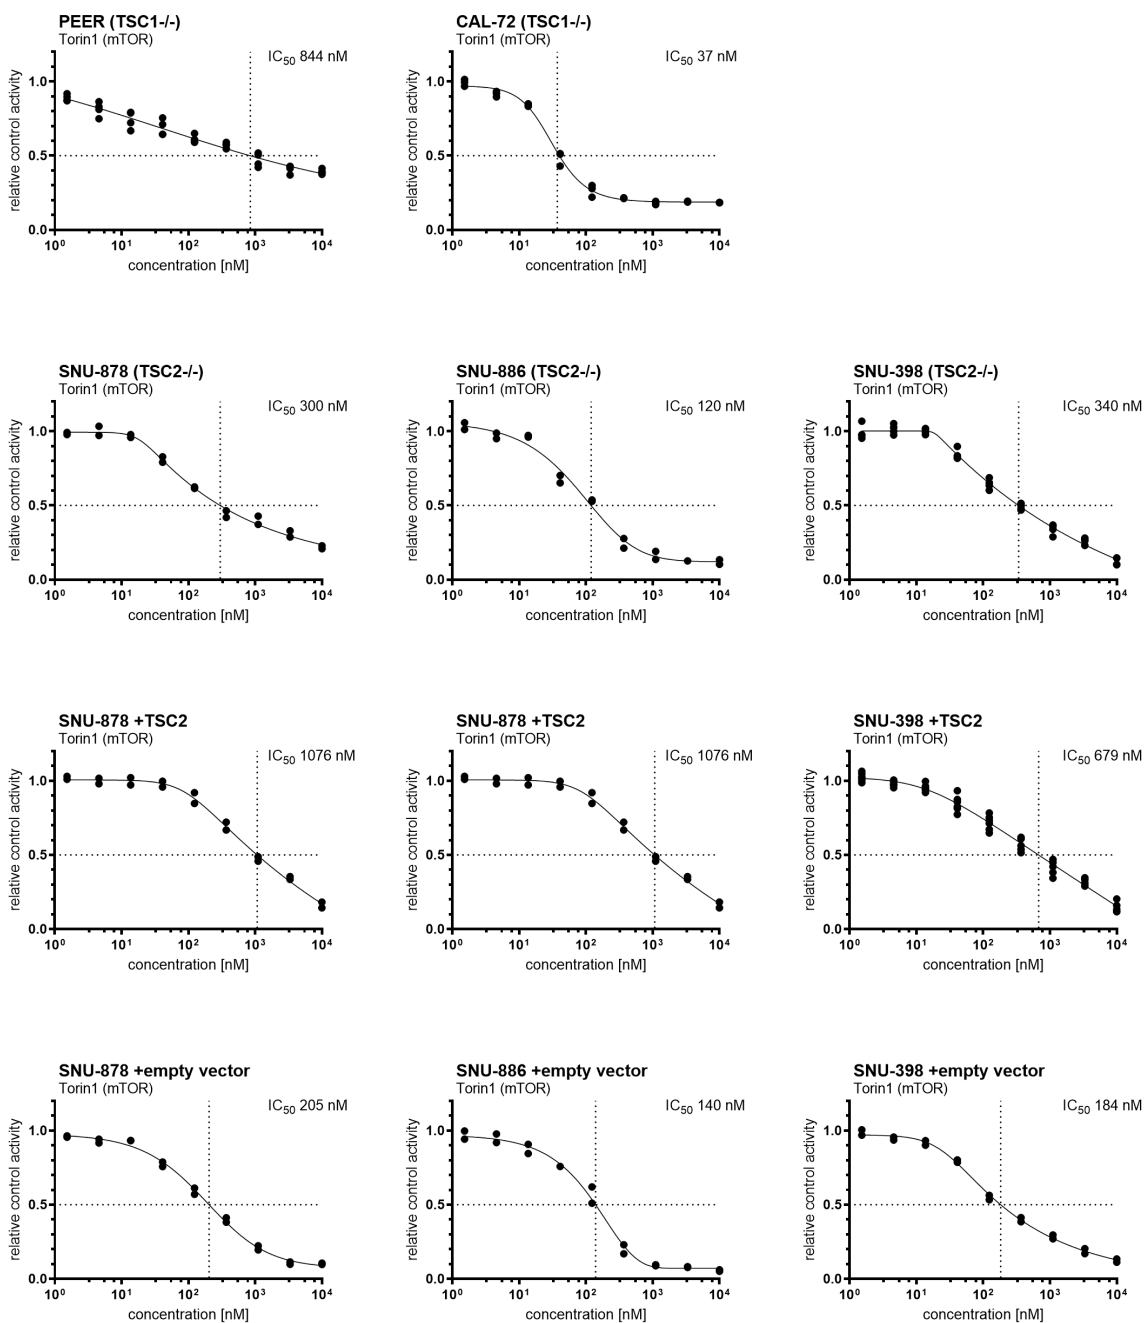

**S5 Fig. Cell viability after Torin1 treatment**

Torin1 was serially diluted three-fold from 10  $\mu$ M to 1.5 nM. Cell viability was determined 72h after treatment using CellTiter-Glo and XLfit4.0 software. Cell viability is shown in relative control activity, n= 2-6. IC<sub>50</sub> was calculated as the drug concentration that reduced cell viability by 50% compared to untreated cells. Torin1 is an mTORC1/2 inhibitor. The SNU cell lines and CAL-72 were very sensitive to all tested mTORC1/2 inhibitors.

## Torin2 (mTOR)

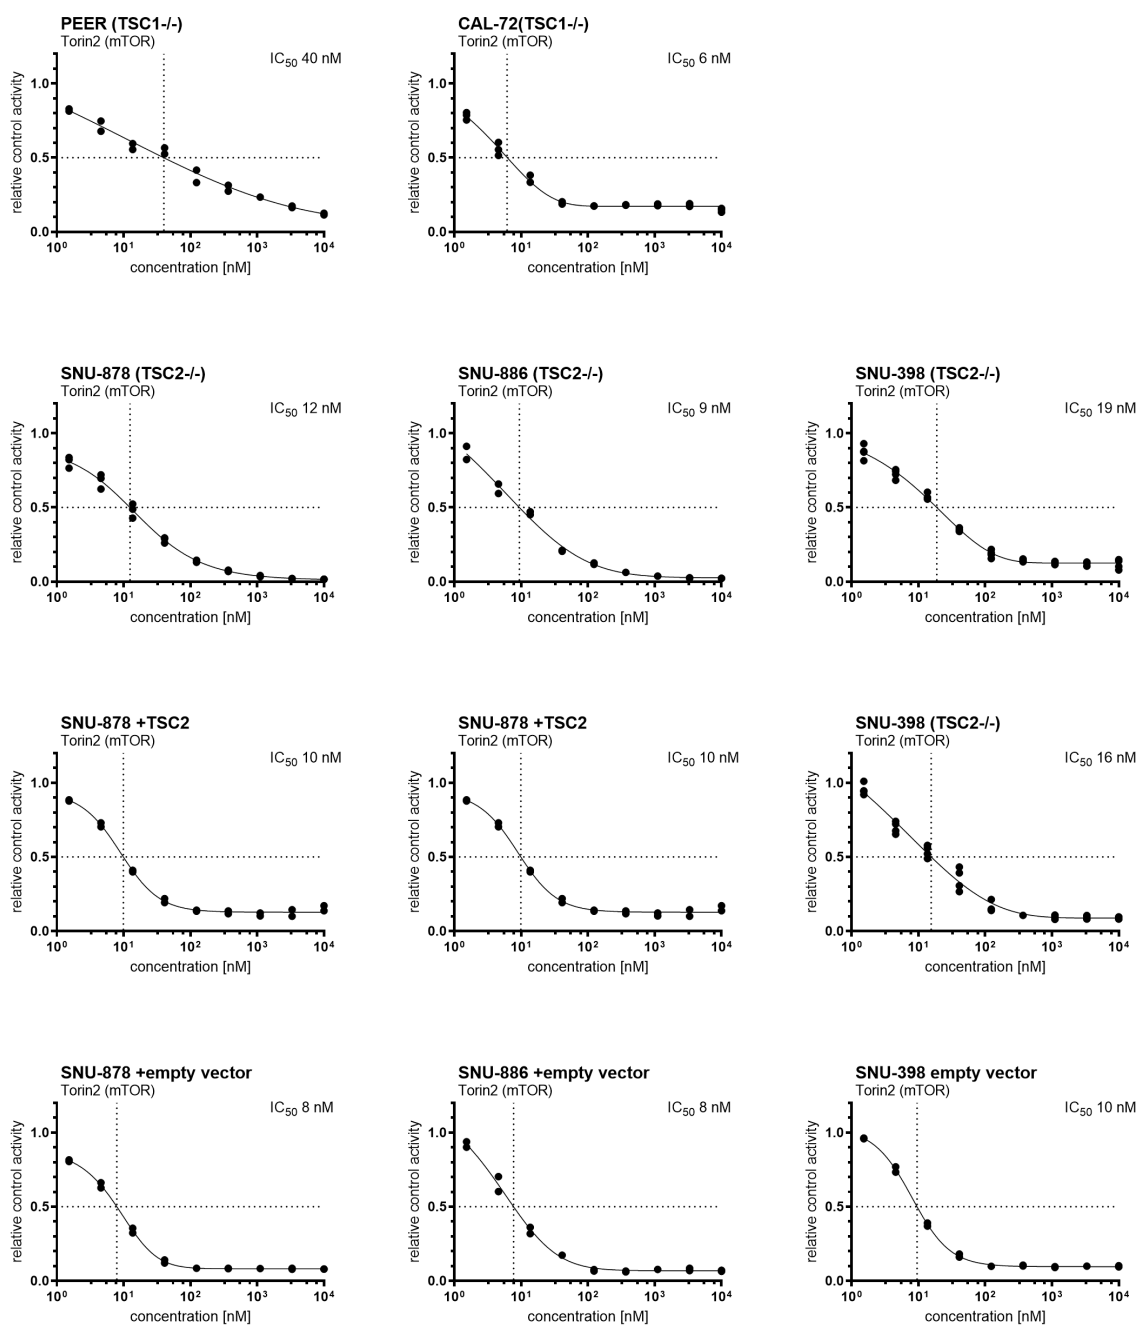

**S6 Fig. Cell viability after Torin2 treatment**

Torin2 was serially diluted three-fold from 10  $\mu$ M to 1.5 nM. Cell viability was determined 72h after treatment using CellTiter-Glo and XLfit4.0 software. Cell viability is shown in relative control activity,  $n = 2-4$ . IC<sub>50</sub> was calculated as the drug concentration that reduced cell viability by 50% compared to untreated cells. Torin2 is an mTORC1/2 inhibitor. Among the tested mTOR inhibitors, Torin2 showed the lowest IC<sub>50</sub> for each of the 5 cell lines.

## INK 128 (mTOR)

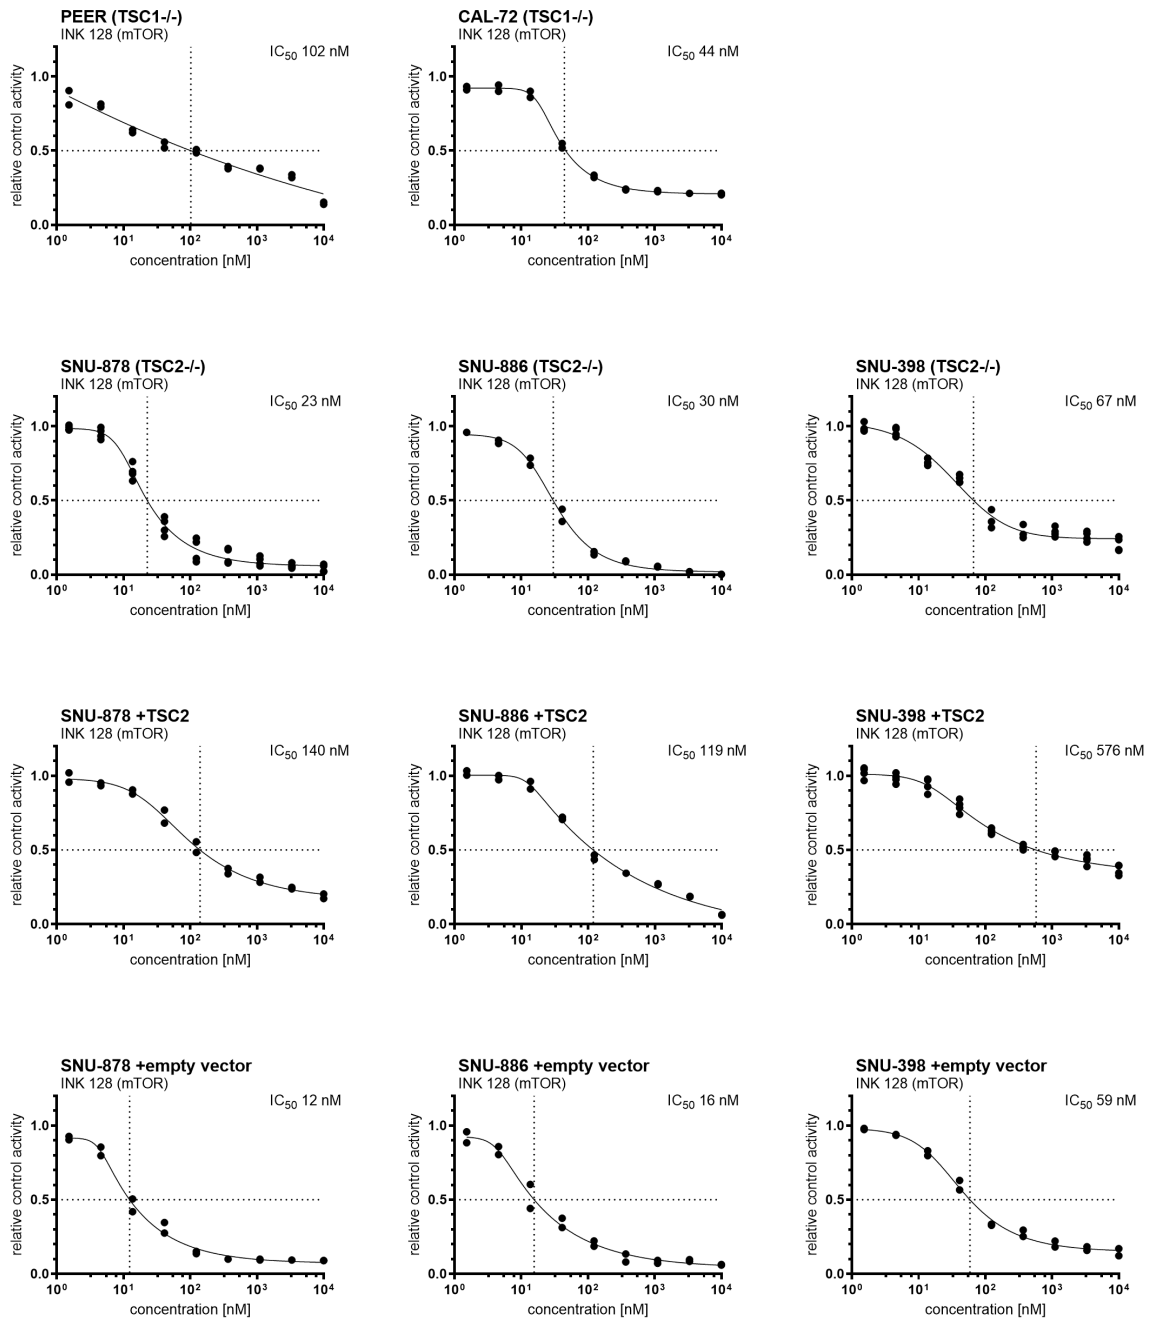

**S7 Fig. Cell viability after INK 128 treatment**

INK 128 was serially diluted three-fold from 10  $\mu$ M to 1.5 nM. Cell viability was determined 72h after treatment using CellTiter-Glo and XLfit4.0 software. Cell viability is shown in relative control activity,  $n=2-4$ . IC<sub>50</sub> was calculated as the drug concentration that reduced cell viability by 50% compared to untreated cells. INK 128 is an mTORC1/2 inhibitor. All TSC1 or TSC2 deficient tumor cell lines were very sensitive to all tested mTORC1/2 inhibitors.

## Flavopiridol (pan-CDKs)

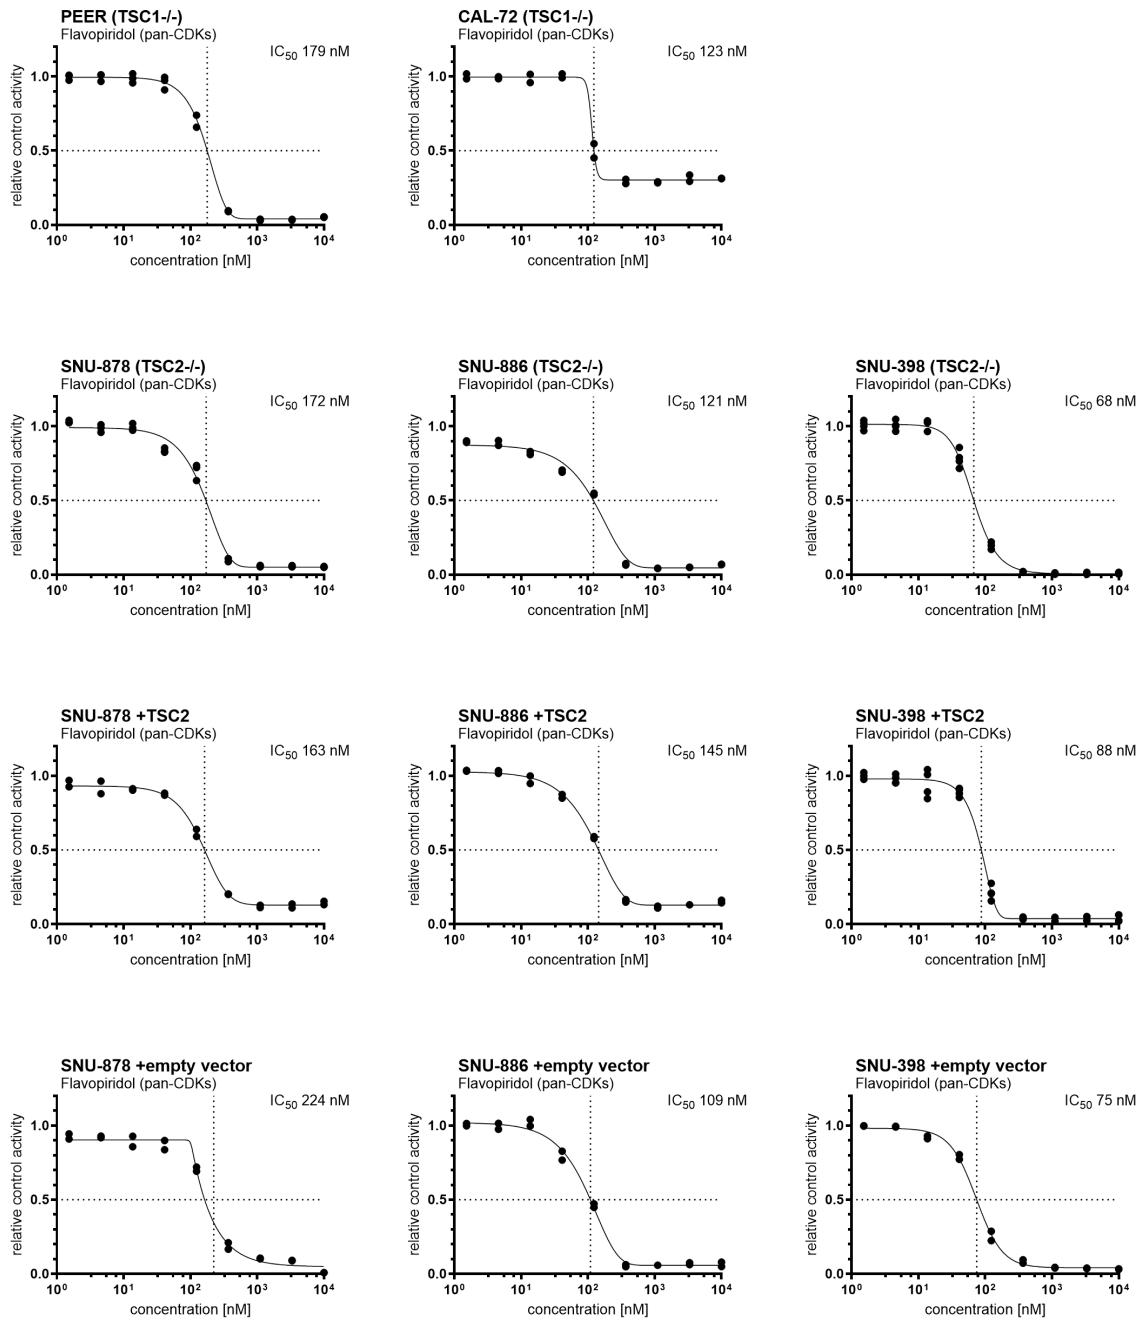

**S8 Fig. Cell viability after Flavopiridol treatment**

Flavopiridol was serially diluted three-fold from 10  $\mu$ M to 1.5 nM. Cell viability was determined 72h after treatment using CellTiter-Glo and XLfit4.0 software. Cell viability is shown in relative control activity,  $n = 2-4$ . IC<sub>50</sub> was calculated as the drug concentration that reduced cell viability by 50% compared to untreated cells. Flavopiridol is a CDKs inhibitor. All cell lines were sensitive to Flavopiridol.



## CGP60474 (CDK1)

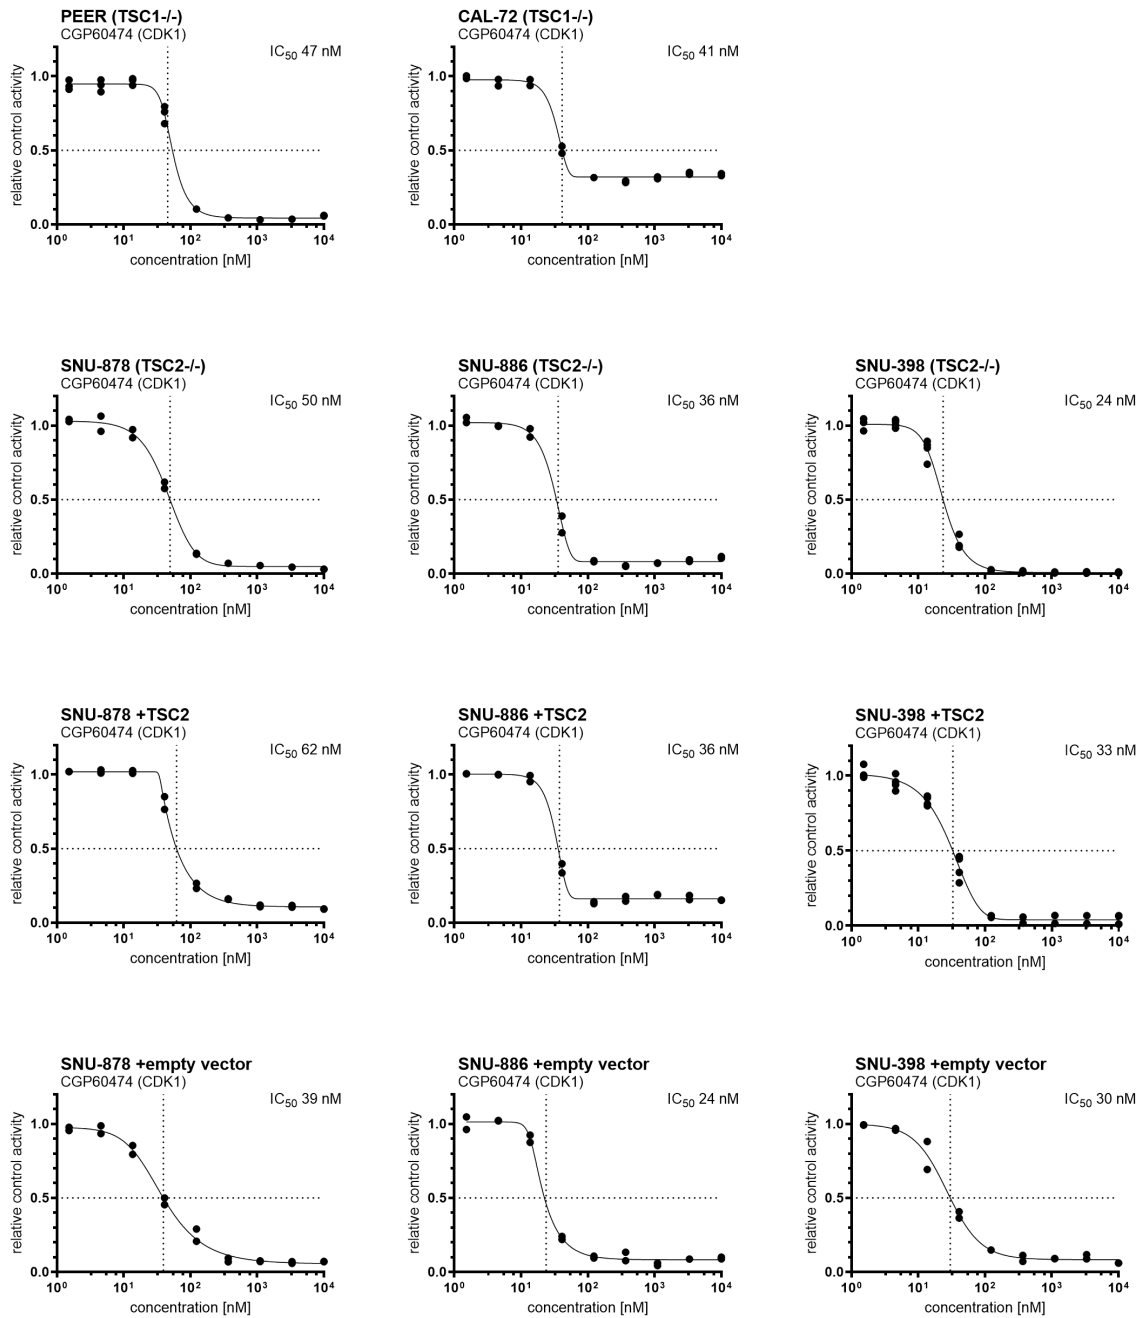

**S9 Fig. Cell viability after CGP60474 treatment**

CGP60474 was serially diluted three-fold from 10  $\mu$ M to 1.5 nM. Cell viability was determined 72h after treatment using CellTiter-Glo and XLfit4.0 software. Cell viability is shown in relative control activity,  $n = 2-4$ . IC<sub>50</sub> was calculated as the drug concentration that reduced cell viability by 50% compared to untreated cells. CGP60474 is CDKs and mTOR inhibitor. All cell lines were sensitive to CGP60474.

## BMS-387032 (CDK9)

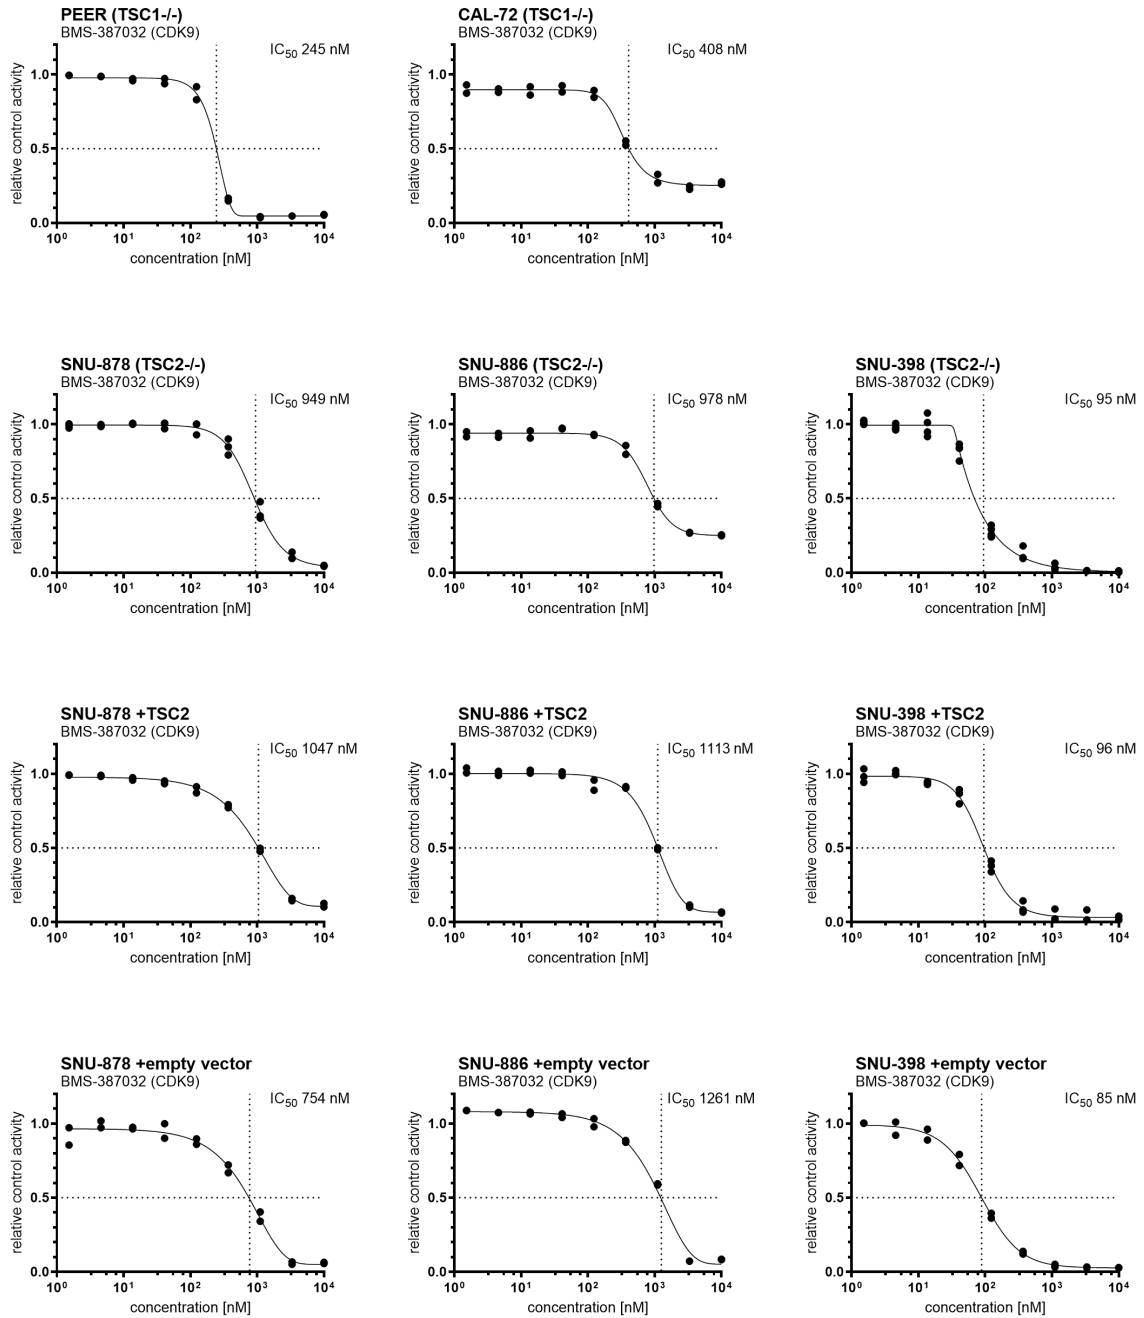

**S10 Fig. Cell viability after BMS-387032 treatment**

BMS-387032 was serially diluted three-fold from 10  $\mu$ M to 1.5 nM. Cell viability was determined 72h after treatment using CellTiter-Glo and XLfit4.0 software. Cell viability is shown in relative control activity,  $n = 2-4$ . IC<sub>50</sub> was calculated as the drug concentration that reduced cell viability by 50% compared to untreated cells. BMS-387032 is a CDKs inhibitor. SNU-398 cells were the most sensitive cell line to BMS-387032.

## GSK461364 (PLK)

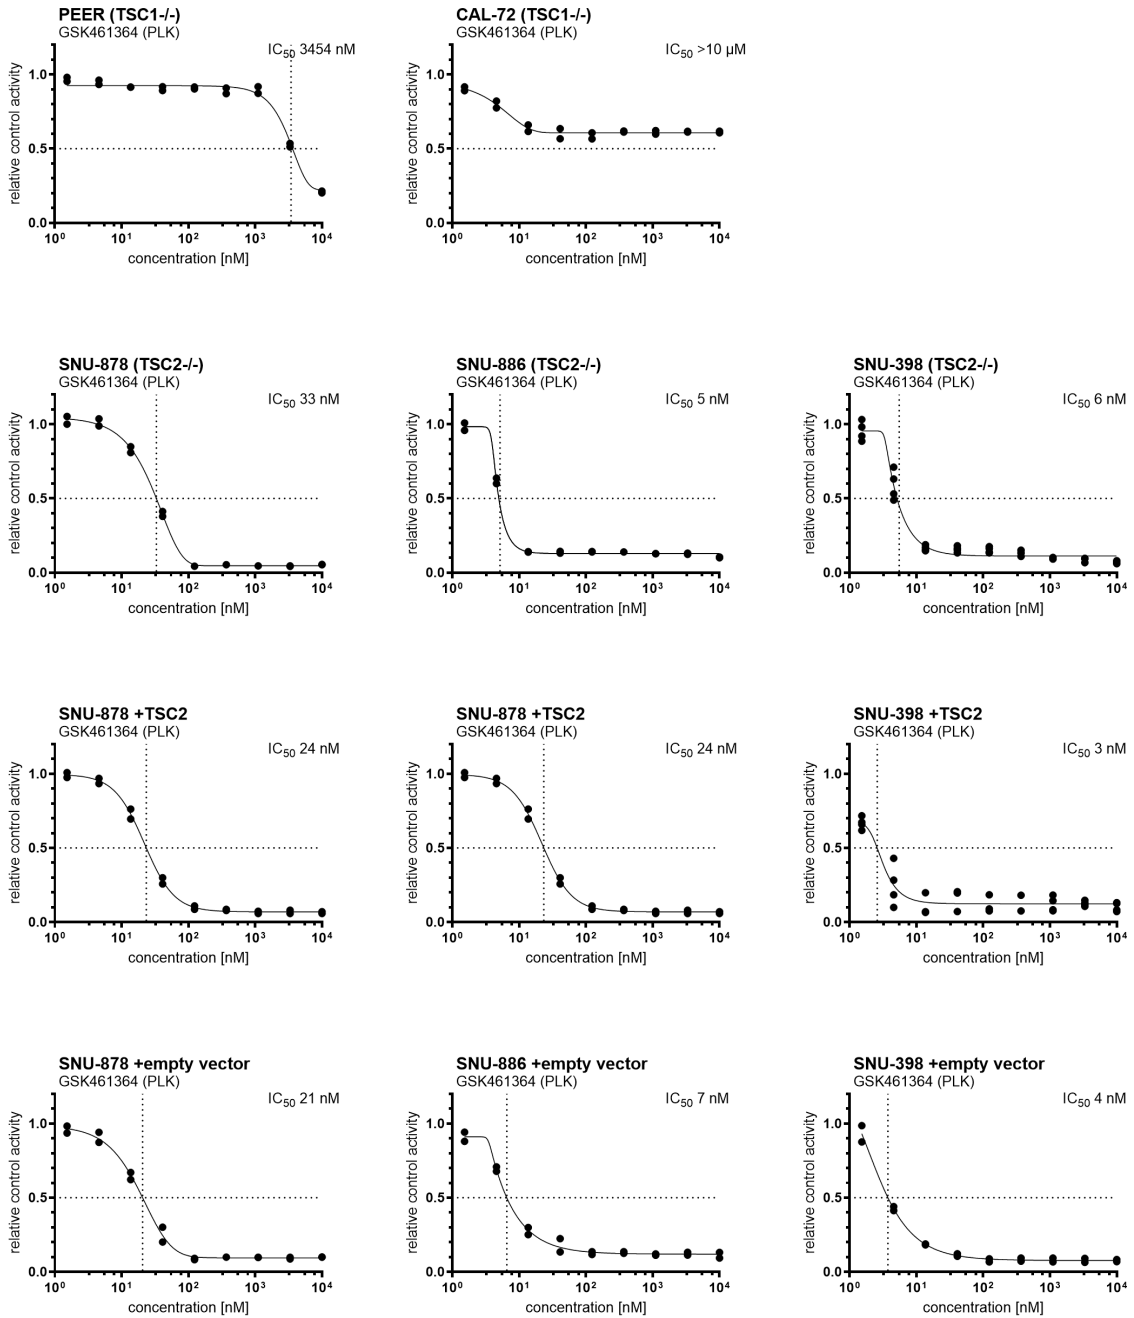

**S11 Fig. Cell viability after GSK461364 treatment**

GSK461364 was serially diluted three-fold from 10 μM to 1.5 nM. Cell viability was determined 72h after treatment using CellTiter-Glo and XLfit4.0 software. Cell viability is shown in relative control activity, n= 2-4. IC<sub>50</sub> was calculated as the drug concentration that reduced cell viability by 50% compared to untreated cells. GSK461364 is a PLK inhibitor. The cell lines SNU-886, SNU-878, and SNU-398 were sensitive to GSK461364, while in contrast the cell lines PEER and CAL-72 were not sensitive.

## HMN-214 (PLK)

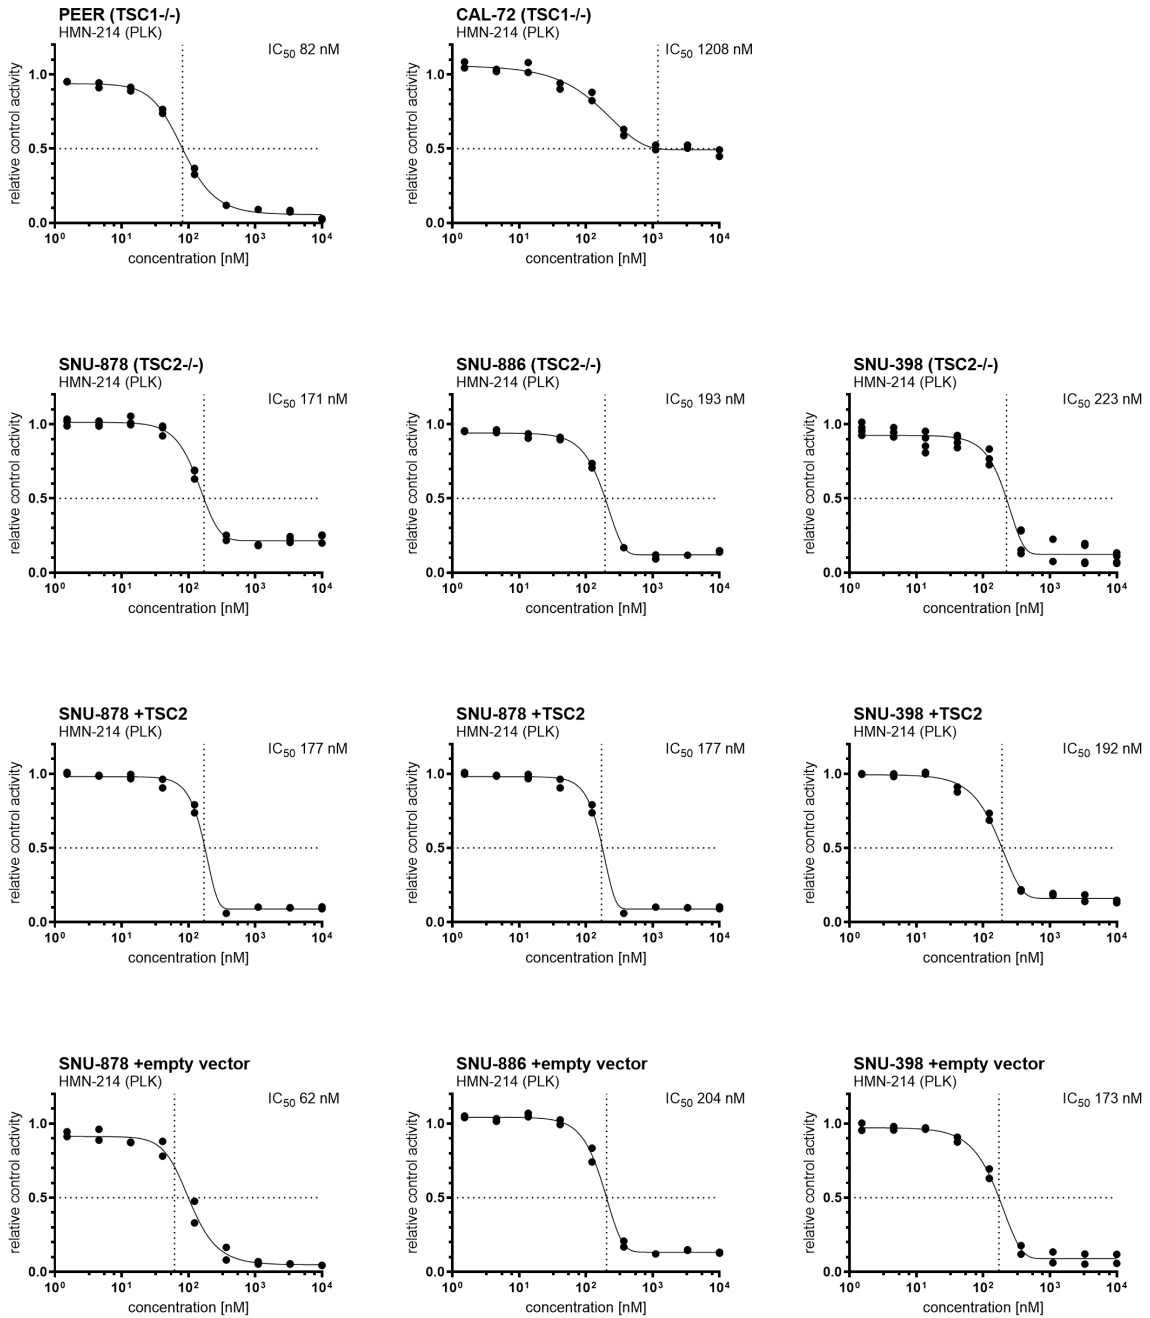

**S12 Fig. Cell viability after HMN-214 treatment**

HMN-214 was serially diluted three-fold from 10  $\mu$ M to 1.5 nM. Cell viability was determined 72h after treatment using CellTiter-Glo and XLfit4.0 software. Cell viability is shown in relative control activity,  $n = 2-4$ . IC<sub>50</sub> was calculated as the drug concentration that reduced cell viability by 50% compared to untreated cells. HMN-214 is a PLK inhibitor. PEER cells were most sensitive to HMN-214.

## GSK1070916 (Aurora)

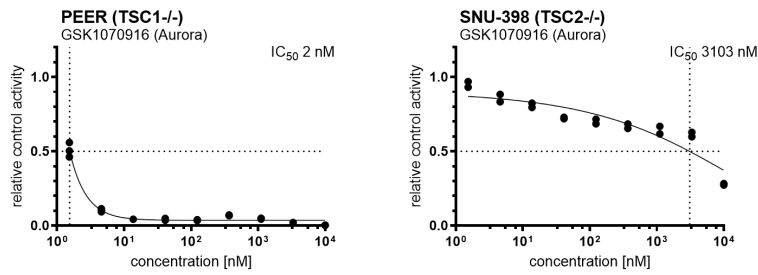

### S13 Fig. Cell viability after GSK1070916 treatment

GSK1070916 was serially diluted three-fold from 10  $\mu$ M to 1.5 nM. Cell viability was determined 72h after treatment using CellTiter-Glo and XLfit4.0 software. Cell viability is shown in relative control activity, n= 2. IC<sub>50</sub> was calculated as the drug concentration that reduced cell viability by 50% compared to untreated cells. GSK1070916 is an Aurora A, B and C inhibitor. TSC1 null PEER cells were very sensitive to all Aurora inhibitors, in contrast to TSC2 null SNU-398 cells, which were much less sensitive to Aurora inhibitors.

## ZM-447439 (Aurora)

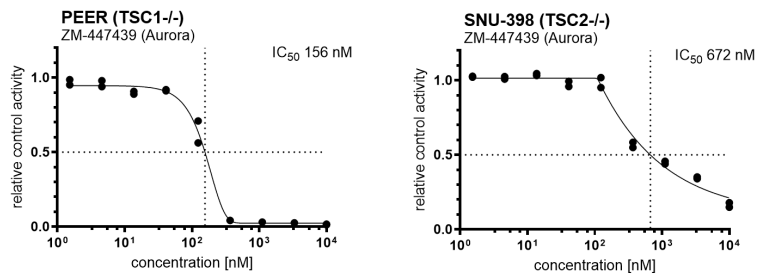

### S14 Fig. Cell viability after ZM-447439 treatment

ZM-447439 was serially diluted three-fold from 10  $\mu$ M to 1.5 nM. Cell viability was determined 72h after treatment using CellTiter-Glo and XLfit4.0 software. Cell viability is shown in relative control activity, n= 2. IC<sub>50</sub> was calculated as the drug concentration that reduced cell viability by 50% compared to untreated cells. ZM-447439 is an Aurora A and B inhibitor. TSC1 null PEER cells were very sensitive to all Aurora inhibitors, in contrast to TSC2 null SNU-398 cells, which were much less sensitive to Aurora inhibitors.

## AZD1152-HQPA (AuroraB)

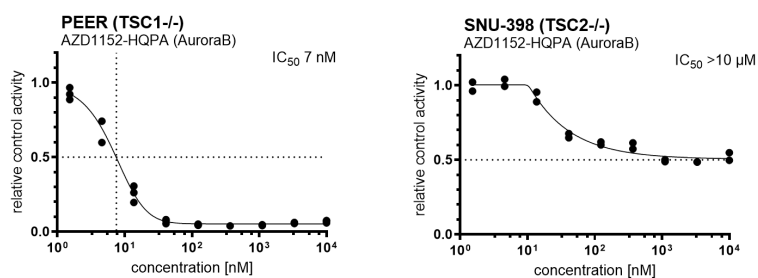

### S15 Fig. Cell viability after AZD1152-HQPA treatment

AZD1152-HQPA was serially diluted three-fold from 10 μM to 1.5 nM. Cell viability was determined 72h after treatment using CellTiter-Glo and XLfit4.0 software. Cell viability is shown in relative control activity, n= 2. IC<sub>50</sub> was calculated as the drug concentration that reduced cell viability by 50% compared to untreated cells. AZD1152-HQPA is an Aurora A, B and C inhibitor. TSC1 null PEER cells were very sensitive to all Aurora inhibitors, in contrast to TSC2 null SNU-398 cells, which were much less sensitive to Aurora inhibitors.

## XMD16-144 (Aurora)

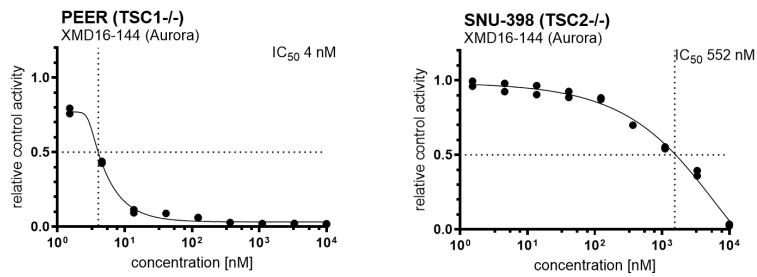

### S16 Fig. Cell viability after XMD16-144 treatment

XMD16-144 was serially diluted three-fold from 10  $\mu$ M to 1.5 nM. Cell viability was determined 72h after treatment using CellTiter-Glo and XLFit4.0 software. Cell viability is shown in relative control activity, n= 2. IC<sub>50</sub> was calculated as the drug concentration that reduced cell viability by 50% compared to untreated cells. XMD16-144 is an Aurora A and B inhibitor. TSC1 null PEER cells were very sensitive to all Aurora inhibitors, in contrast to TSC2 null SNU-398 cells, which were much less sensitive to Aurora inhibitors.



## NVP-AUY922 (HSP90)

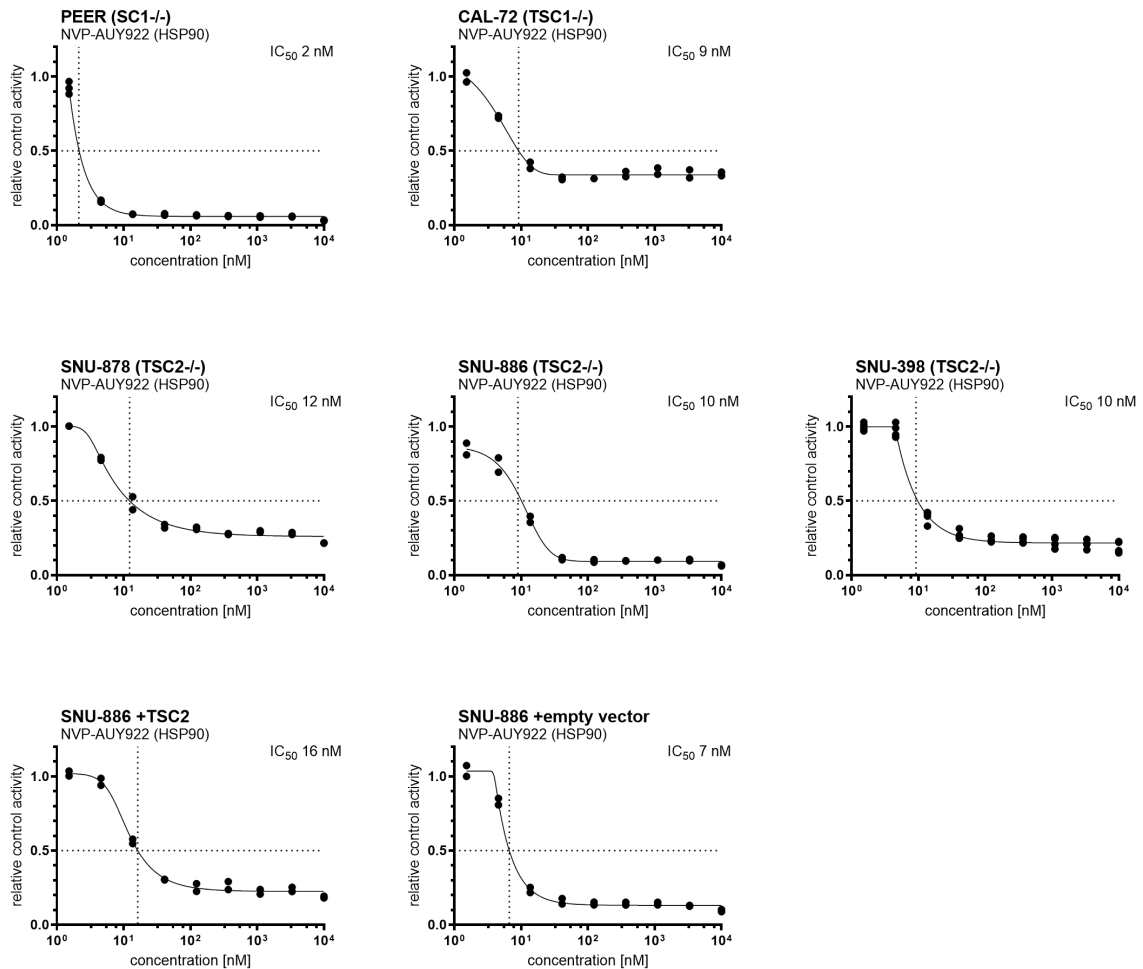

**S17 Fig. Cell viability after NVP-AUY922 treatment**

NVP-AUY922 was serially diluted three-fold from 10  $\mu$ M to 1.5 nM. Cell viability was determined 72h after treatment using CellTiter-Glo and XLfit4.0 software. Cell viability is shown in relative control activity, n= 2-4. IC<sub>50</sub> was calculated as the drug concentration that reduced cell viability by 50% compared to untreated cells. NVP-AUY922 is an HSP90 inhibitor. All cell lines were very sensitive to NVP-AUY922.

## Ganetespib (HSP90)

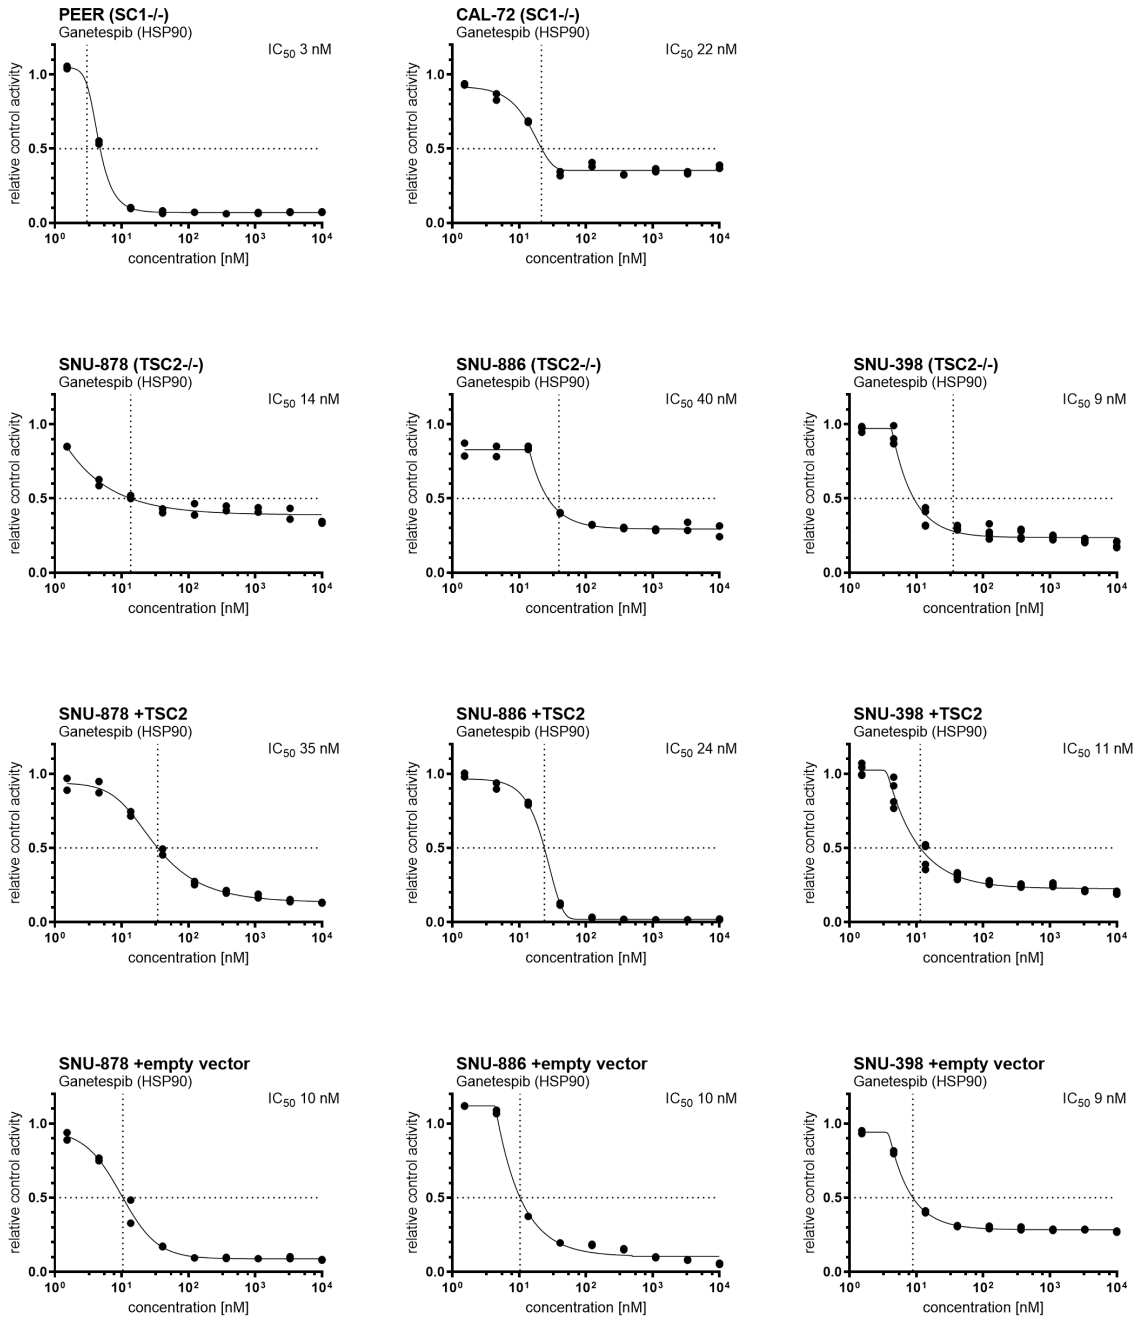

**S18 Fig. Cell viability after ganetespib treatment**

Ganetespib was serially diluted three-fold from 10  $\mu$ M to 1.5 nM. Cell viability was determined 72h after treatment using CellTiter-Glo and XLfit4.0 software. Cell viability is shown in relative control activity,  $n = 2-4$ . IC<sub>50</sub> was calculated as the drug concentration that reduced cell viability by 50% compared to untreated cells. Ganetespib is an HSP90 inhibitor. All cell lines were very sensitive to ganetespib.

## GSK2126458 (PI3K)

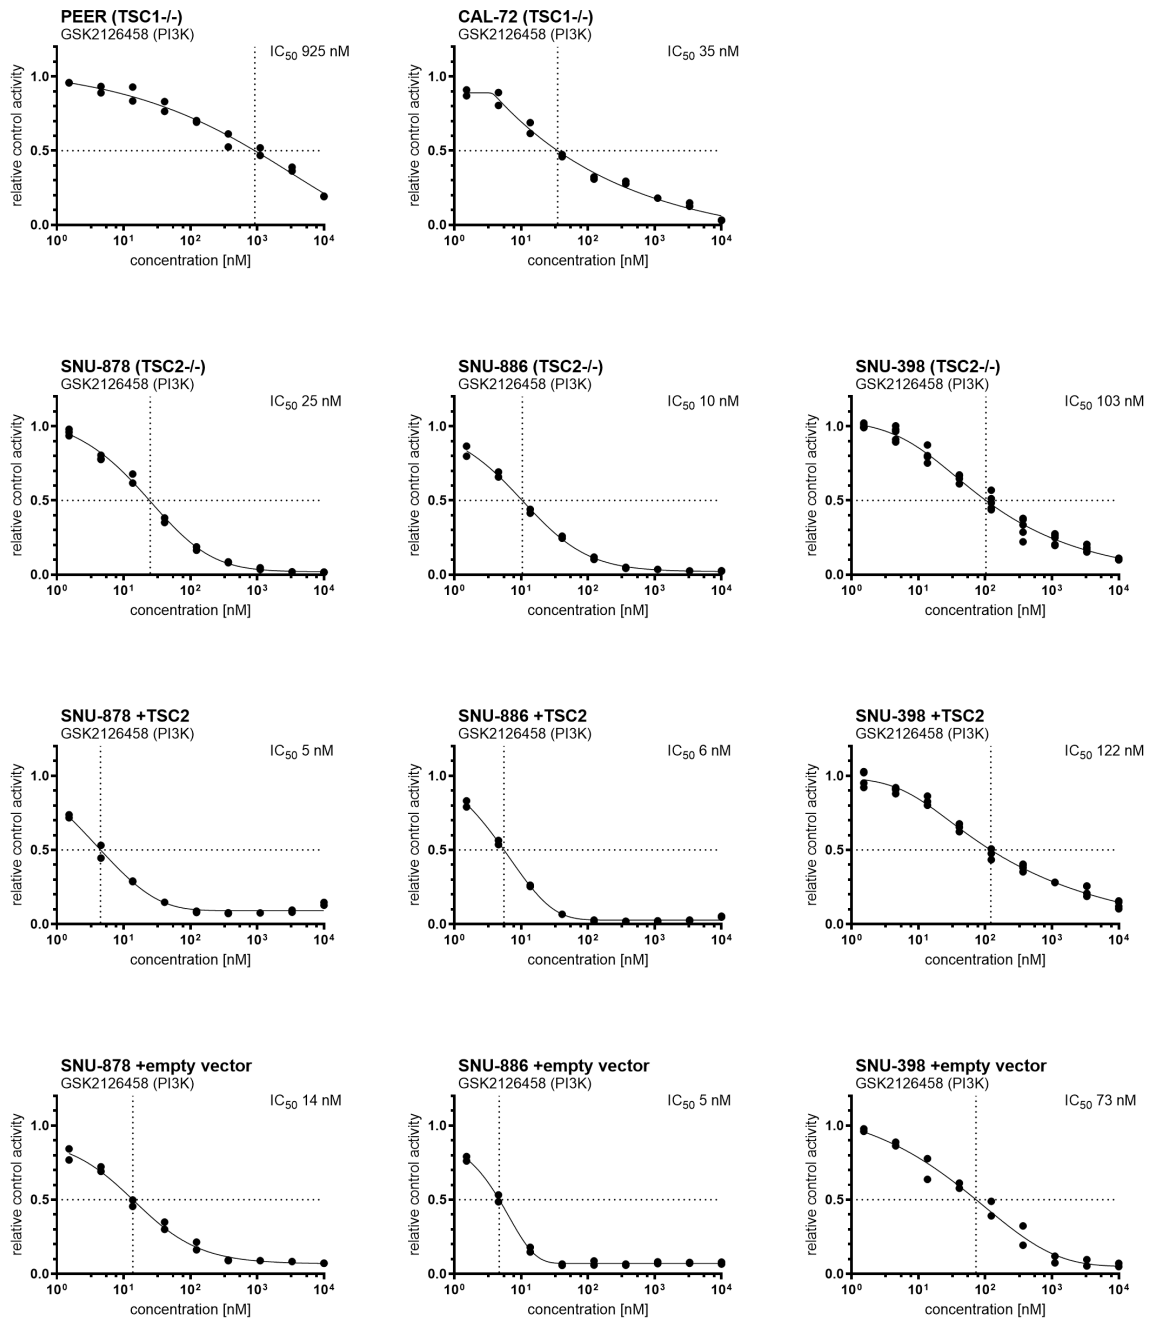

**S19 Fig. Cell viability after GSK2126458 treatment**

GSK2126458 was serially diluted three-fold from 10  $\mu$ M to 1.5 nM. Cell viability was determined 72h after treatment using CellTiter-Glo and XLfit4.0 software. Cell viability is shown in relative control activity,  $n = 2$ . IC<sub>50</sub> was calculated as the drug concentration that reduced cell viability by 50% compared to untreated cells. GSK2126458 is a PI3K inhibitor. CAL-72 and the SNU cell lines were sensitive to GSK2126458.

## WZ3105 (CLK2/CNSK1E/FLT3/ULK1)

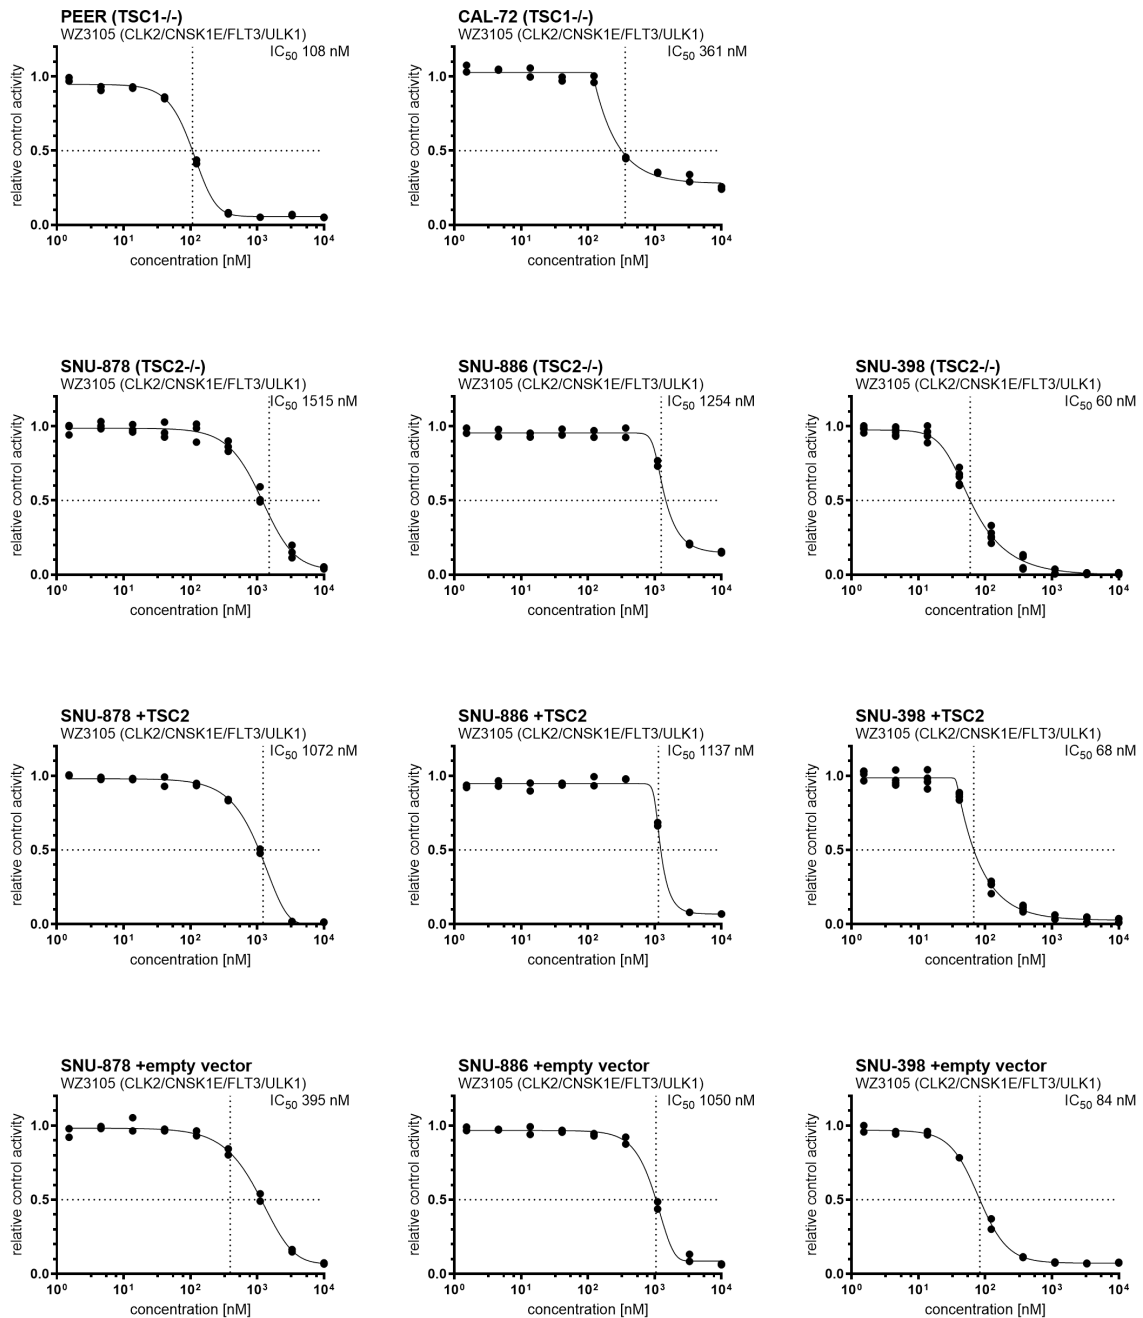

**S20 Fig. Cell viability after WZ3105 treatment**

WZ3105 was serially diluted three-fold from 10  $\mu$ M to 1.5 nM. Cell viability was determined 72h after treatment using CellTiter-Glo and XLfit4.0 software. Cell viability is shown in relative control activity,  $n = 2$ . IC<sub>50</sub> was calculated as the drug concentration that reduced cell viability by 50% compared to untreated cells. WZ3105 is a CLK2, CNSK1E, FLT3 and ULK1 inhibitor. PEER, CAL-72 and SNU-398 cells were sensitive to WZ3105.

## MK 1775 (Wee1)

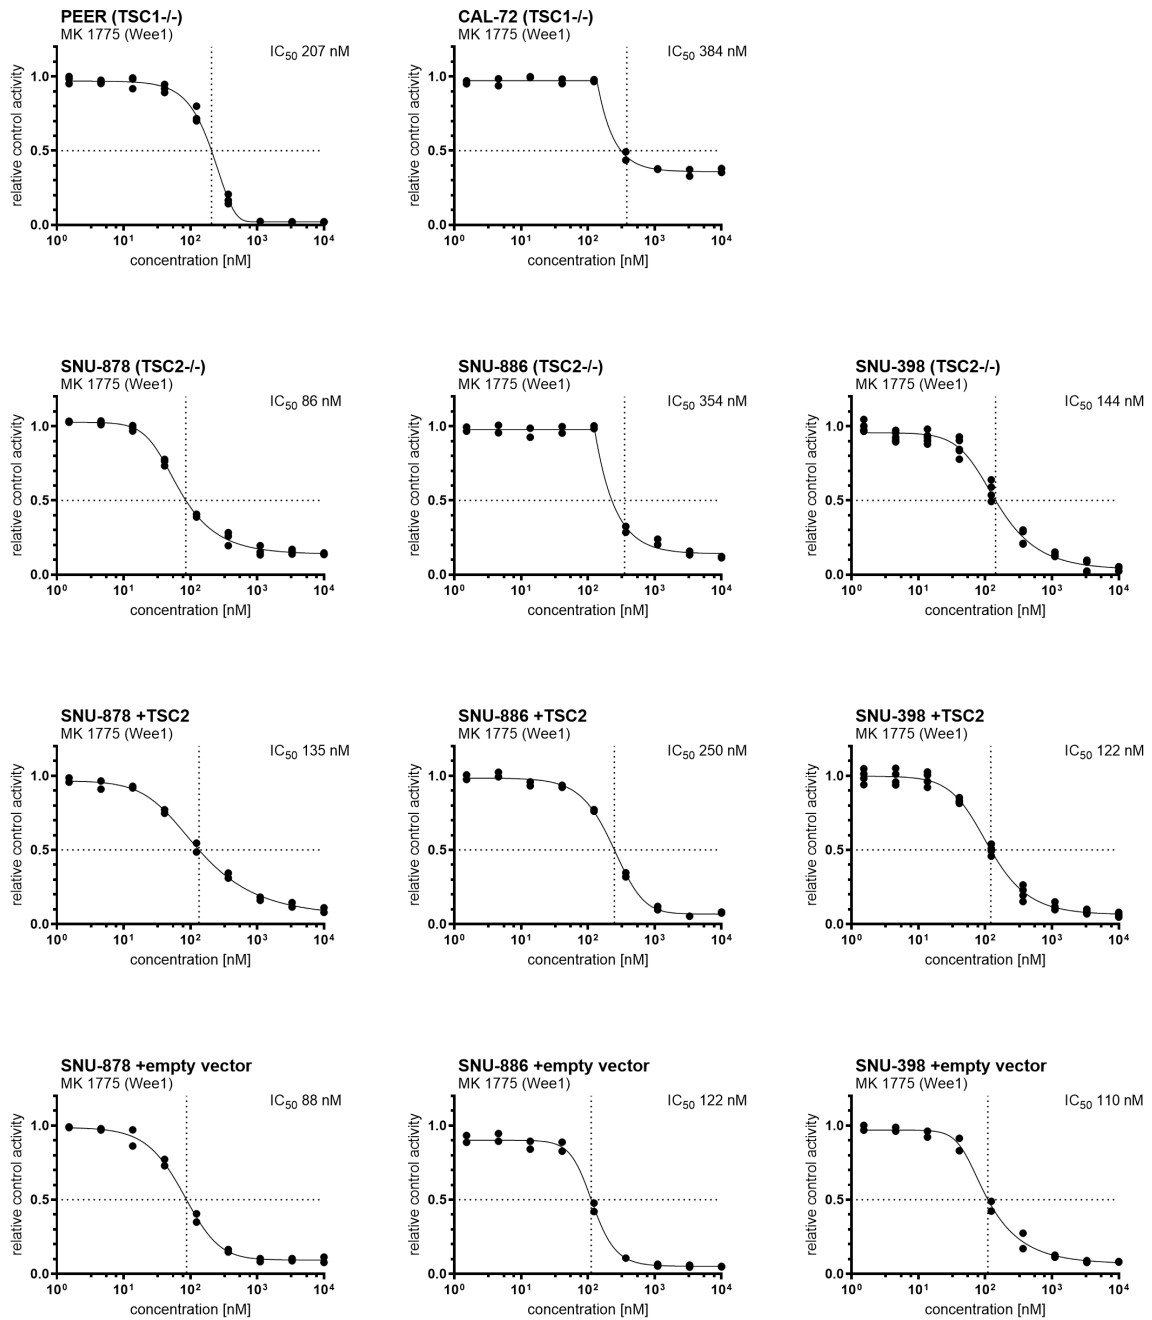

**S21 Fig. Cell viability after MK 1775 treatment**

MK 1775 was serially diluted three-fold from 10  $\mu$ M to 1.5 nM. Cell viability was determined 72h after treatment using CellTiter-Glo and XLfit4.0 software. Cell viability is shown in relative control activity,  $n = 2-5$ . IC<sub>50</sub> was calculated as the drug concentration that reduced cell viability by 50% compared to untreated cells. MK 1775 is a Wee1 inhibitor. All cell lines were sensitive to MK 1775.

**a** treatment: vehicle

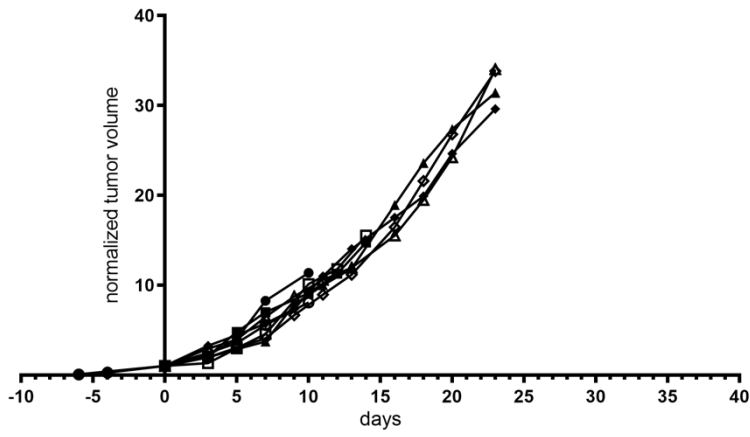

**b** treatment: Ganetespib

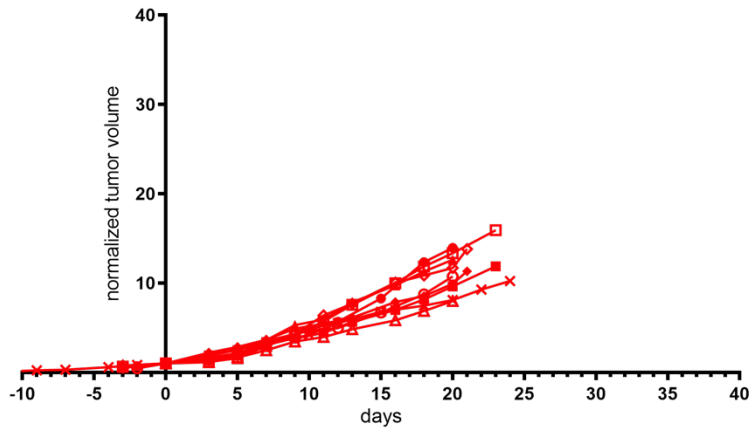

**c** treatment: INK 128

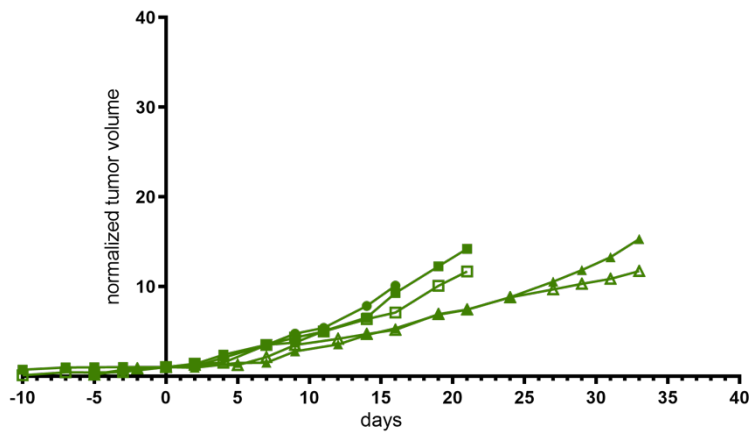

**d** treatment: Rapamycin

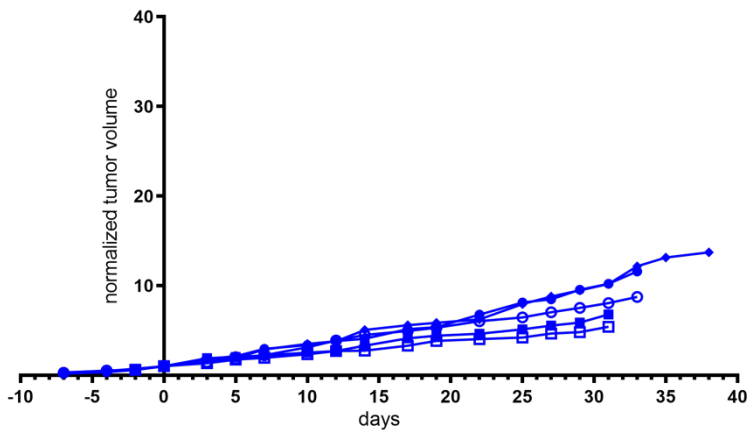

**e** treatment: Ganetespib and INK 128

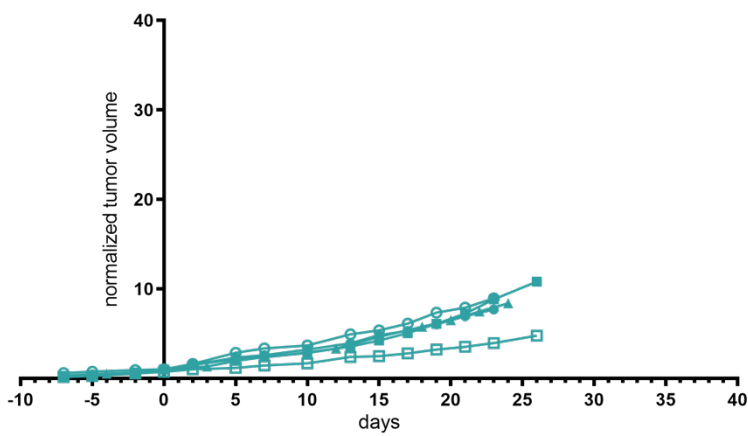

**f** treatment: Ganetespib and Rapamycin

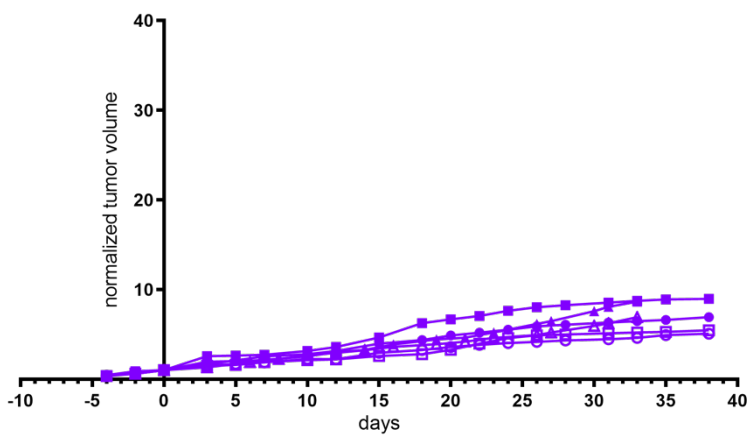

**S22 Fig. S-398 tumor xenograft treatment.**

Tumor volume is shown as normalized tumor volume to day 1 of treatment. Tumors were measured every 2-3 days. Each tumor is depicted separately, n= 5- 9 per treatment. Mice were treated with vehicle (a), ganetespib (50mg/kg, 1x/week, i.v.) (b), INK 128 (1mg/kg, 5x/week, i.g.) (c), rapamycin (3 mg/kg, 3x/week, i.p.) (d), or ganetespib and rapamycin combined (same doses) (e) or ganetespib and INK 128 combined (same doses) (f). Tumors under treatment grew less compared to vehicle-treated tumors.
